# Supplementary material for: Green and efficient synthesis of 5-amino-1H-pyrazole-5-carbonitriles utilizing novel modified LDH
Source: Royal Society of Chemistry journal article supplement (doi:10.1039/d4na00577e), 2024-01-01
Supplement: d4na00577e1.pdf [file d4na00577e1.pdf]

## Supporting Information

### Green and efficient synthesis of 5-amino-1*H*-pyrazole-5-carbonitriles utilizing novel modified LDH

Sarieh Momeni, Ramin Ghorbani-Vaghei\*

Department of Organic Chemistry, Faculty of Chemistry and Petroleum Sciences, Bu-Ali Sina University, 6517838683, Hamadan, Iran

\*Corresponding author; E-mail: [rgvaghei@yahoo.com](mailto:rgvaghei@yahoo.com) & [ghorbani@basu.ac.ir](mailto:ghorbani@basu.ac.ir)

#### General procedure for the one-pot synthesis of 5-amino-1*H*-pyrazole-5-carbonitriles

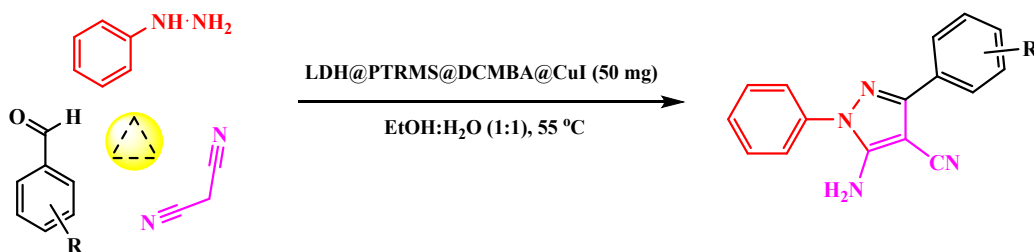

In a standard experimental procedure, the following components were combined in a 5 mL round-bottomed flask: In a test tube containing phenyl hydrazine (1 mmol), benzaldehyde derivatives (1 mmol), malononitrile (1 mmol), and the LDH@PTRMS@DCMBA@CuI catalyst (0.05 g), the mixture was stirred at 55 °C using a magnetic stirrer for an appropriate period of time. The advancement of the reaction was tracked using TLC (n-hexane/ethyl acetate: 0.5:0.5 mL) to observe the transformation of reactants into products. Once the reaction reached completion and the desired compound was obtained, the mixture was allowed to cool to room temperature. To isolate the catalyst, 3 mL of either hot ethanol or chloroform was introduced into the reaction mixture.

Subsequently, the catalyst (LDH@PTRMS@DCMBA@CuI) was separated through centrifugation, thoroughly washed, and subsequently dried in an oven at 60 °C to remove any residual solvent and moisture. The solvent of the reaction mixture was evaporated, and the products were recrystallized with ethanol, yielding the compounds with high yield. The products were identified using FTIR, <sup>1</sup>H NMR, and <sup>13</sup>C NMR spectra, and the melting points of all products were recorded.

## Spectral Data:

### S1. 5-amino-3-(4-chlorophenyl)-1-phenyl-1H-pyrazole-4-carbonitrile (4b)

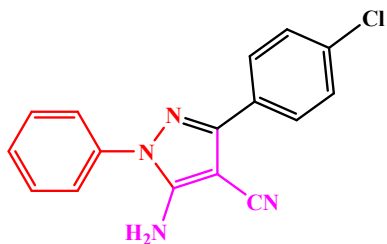

M.p. 190-192 °C, FT-IR (KBr,  $\nu$   $\text{cm}^{-1}$ ): 3447, 3346, 3313, 3208, 3055, 2928, 2206, 1632, 1600, 1519, 1489, 1259, 1135, 1084, 914, 829, 749, 509;  $^1\text{H}$  NMR (250 MHz,  $\text{CDCl}_3$ )  $\delta$  7.62 (t,  $J$  = 11.5 Hz, 5H), 7.40 – 7.28 (m, 3H), 7.11 (d,  $J$  = 8.0 Hz, 2H), 6.91 (d,  $J$  = 7.7 Hz, 1H);  $^{13}\text{C}$  NMR (63 MHz,  $\text{CDCl}_3$ )  $\delta$  153.12, 144.40, 142.44, 135.81, 133.90, 130.91, 129.46, 129.31, 129.03, 128.81, 128.33, 127.25, 120.33, 112.79.

### S2. 5-amino-3-(3-nitrophenyl)-1-phenyl-1H-pyrazole-4-carbonitrile (4c)

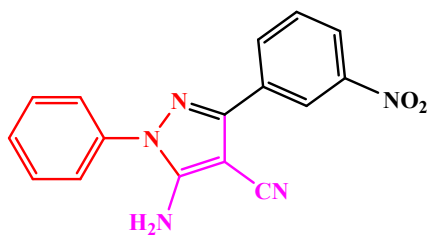

M.p. 128-130 °C, FT-IR (KBr,  $\nu$   $\text{cm}^{-1}$ ): 3442, 3305, 3221, 3058, 2928, 2205, 1600, 1583, 1514, 1485, 1258, 1139, 905, 822, 758, 511;  $^1\text{H}$  NMR (250 MHz,  $\text{CDCl}_3$ )  $\delta$  8.44 (s, 1H), 8.11 (d,  $J$  = 8.2 Hz, 1H), 7.98 (d,  $J$  = 7.9 Hz, 1H), 7.70 (s, 2H), 7.53 (t,  $J$  = 8.0 Hz, 1H), 7.32 (t,  $J$  = 7.8 Hz, 2H), 7.15 (d,  $J$  = 8.0 Hz, 2H), 6.94 (t,  $J$  = 7.2 Hz, 1H);  $^{13}\text{C}$  NMR (63 MHz,  $\text{CDCl}_3$ )  $\delta$  148.69, 143.90, 137.35, 134.64, 133.90, 131.41, 130.19, 129.79, 129.47, 124.51, 122.54, 120.91, 112.99.

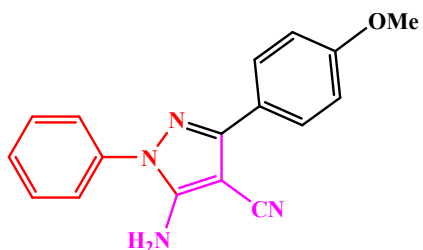

**S3. 5-amino-3-(4-methoxyphenyl)-1-phenyl-1*H*-pyrazole-4-carbonitrile (4e)**

M.p. 107-109 °C, FT-IR (KBr,  $\nu$   $\text{cm}^{-1}$ ): 3445, 3340, 3315, 3210, 3055, 2954, 2206, 1597, 1508, 1441, 1295, 1246, 1175, 1129, 1028, 821, 684, 532;  $^1\text{H}$  NMR (250 MHz,  $\text{CDCl}_3$ )  $\delta$  8.27 – 7.46 (m, 4H), 7.31 (s, 1H), 7.25 (s, 1H), 7.10 (d,  $J = 7.8$  Hz, 2H), 6.91 (d,  $J = 8.6$  Hz, 2H), 6.86 (s, 1H), 3.84 (s, 3H);  $^{13}\text{C}$  NMR (63 MHz,  $\text{CDCl}_3$ )  $\delta$  160.08, 151.20, 144.52, 137.98, 131.96, 130.22, 129.21, 127.67, 119.87, 114.27, 114.06, 112.76, 55.28.

**S4. 5-amino-3-(4-bromophenyl)-1-phenyl-1*H*-pyrazole-4-carbonitrile (4f)**

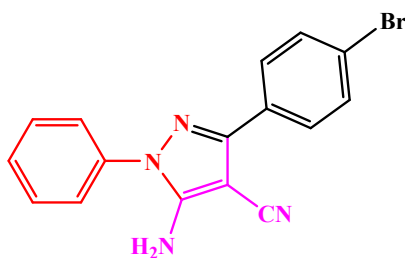

M.p. 161-163 °C, FT-IR (KBr,  $\nu$   $\text{cm}^{-1}$ ): 3447, 3345, 3314, 3218, 3047, 2954, 2836, 2204, 1588, 1508, 1440, 1295, 1246, 1129, 1175, 1028, 921, 839, 746, 531;  $^1\text{H}$  NMR (250 MHz,  $\text{CDCl}_3$ )  $\delta$  7.59 (d,  $J = 4.1$  Hz, 2H), 7.51 (d,  $J = 3.8$  Hz, 4H), 7.41 – 7.26 (m, 2H), 7.11 (d,  $J = 7.4$  Hz, 2H), 6.91 (d,  $J = 6.3$  Hz, 1H);  $^{13}\text{C}$  NMR (63 MHz,  $\text{CDCl}_3$ )  $\delta$  144.32, 135.79, 134.27, 132.42, 131.96, 131.69, 131.22, 130.12, 129.29, 128.28, 127.48, 122.10, 120.32, 112.76.

**S5. 5-amino-3-(2,4-dichlorophenyl)-1-phenyl-1*H*-pyrazole-4-carbonitrile (4g)**

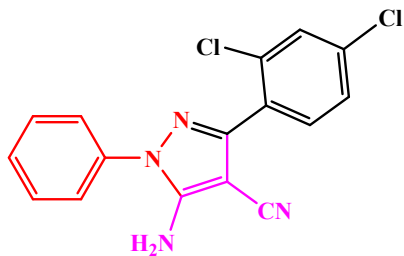

M.p. 160-161 °C, FT-IR (KBr,  $\nu$   $\text{cm}^{-1}$ ): 3414, 3311, 3200, 3052, 2210, 1600, 1576, 1504, 1445, 1262, 1233, 1134, 1070, 913, 836, 754, 508;  $^1\text{H}$  NMR (250 MHz,  $\text{CDCl}_3$ )  $\delta$  8.01 (d,  $J = 6.8$  Hz, 4H), 7.33 (d,  $J = 16.4$  Hz, 2H), 7.12 (d,  $J = 7.9$  Hz, 2H), 7.03 (s, 1H), 6.92 (t,  $J = 7.3$  Hz, 1H);  $^{13}\text{C}$  NMR (63 MHz, DMSO)  $\delta$  157.05, 145.07, 132.88, 132.53, 132.08, 131.49, 131.27, 130.69, 129.62, 128.70, 128.11, 127.38, 120.00, 112.75.

#### S6. 5-amino-3-(4-hydroxyphenyl)-1-phenyl-1H-pyrazole-4-carbonitrile (4h)

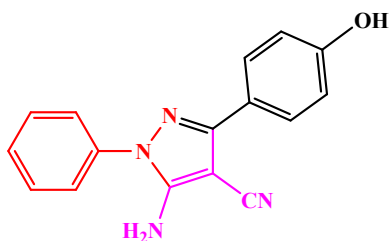

M.p. 206-208 °C, FT-IR (KBr,  $\nu$   $\text{cm}^{-1}$ ): 3479, 3368, 3347, 3233, 3055, 2923, 2210, 1642, 1597, 1520, 1448, 1274, 1228, 1172, 918, 829, 697, 513.  $^1\text{H}$  NMR (250 MHz,  $\text{DMSO}-d_6$ )  $\delta$  9.74 (s, 1H), 7.98 – 7.62 (m, 2H), 7.47 (d,  $J = 27.5$  Hz, 5H), 6.90 (s, 2H), 6.67 (s, 2H).  $^{13}\text{C}$  NMR (63 MHz, DMSO)  $\delta$  158.77, 153.17, 150.94, 137.93, 129.92, 128.30, 127.89, 126.09, 124.65, 122.59, 115.97, 115.38.

**S7. 5-amino-3-(4-fluorophenyl)-1-phenyl-1H-pyrazole-4-carbonitrile (4i)**

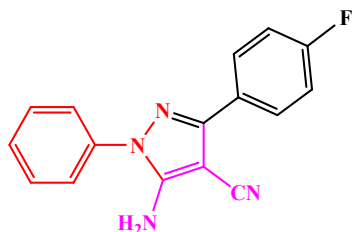

M.p. 163-165 °C, FT-IR (KBr,  $\nu$   $\text{cm}^{-1}$ ): 3462, 3345, 3312, 3215, 3055, 2207, 1600, 1577, 1504, 1446, 1262, 1233, 1135, 1092, 836, 753, 693;  $^1\text{H}$  NMR (250 MHz, DMSO- $d_6$ )  $\delta$  8.28 (s, 1H), 8.11 – 7.74 (m, 2H), 7.55 (s, 2H), 7.43 (d,  $J$  = 6.9 Hz, 2H), 7.32 (d,  $J$  = 9.3 Hz, 2H), 6.87 (s, 2H);  $^{13}\text{C}$  NMR (63 MHz, DMSO)  $\delta$  164.21, 160.41, 153.37, 145.75, 135.79, 132.89, 129.97, 129.53, 128.57, 127.93, 124.77, 119.19, 116.56, 116.18, 115.86, 112.44.

**S8. 5-amino-1-phenyl-3-(p-tolyl)-1H-pyrazole-4-carbonitrile (4j)**

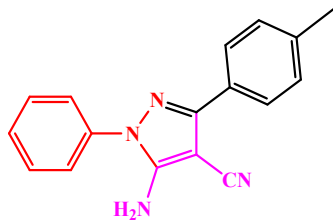

M.p. 116-118 °C, FT-IR (KBr,  $\nu$   $\text{cm}^{-1}$ ): 3460, 3422, 3351, 3172, 3036, 2930, 2225, 1650, 1605, 1588, 1577, 1451, 1414, 1376, 1222, 1192, 939, 815, 615, 521;  $^1\text{H}$  NMR (250 MHz, DMSO- $d_6$ )  $\delta$  8.46 (s, 2H), 7.85 (s, 2H), 7.62 – 7.17 (m, 5H), 6.75 (s, 2H), 2.39 (s, 3H);  $^{13}\text{C}$  NMR (63 MHz, DMSO)  $\delta$  161.77, 156.69, 146.13, 133.17, 131.13, 130.61, 129.92, 129.20, 128.91, 128.10, 124.40, 114.85, 21.91.

**S9. 5-amino-3-(4-nitrophenyl)-1-phenyl-1H-pyrazole-4-carbonitrile (4d)**

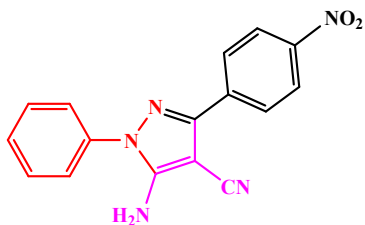

M.p. 163-164 °C, FT-IR (KBr,  $\nu$   $\text{cm}^{-1}$ ): 3419, 3355, 3315, 3196, 3028, 2210, 1635, 1602, 1566, 1522, 1443, 1398, 1288, 1261, 1066, 1026, 929, 882, 756, 751, 508;  $^1\text{H}$  NMR (250 MHz, )  $\delta$  8.01 (s, 2H), 7.49 (d,  $J=23.5$  Hz, 2H), 7.19 (s, 5H), 6.73 (s, 2H);  $^{13}\text{C}$  NMR (63 MHz, DMSO)  $\delta$  165.00, 150.65, 145.71, 135.97, 134.75, 134.50, 131.58, 130.28, 129.46, 127.04, 123.32, 122.63, 119.24, 112.49.

**S10. 5-amino-1,3-diphenyl-1H-pyrazole-4-carbonitrile (4a)**

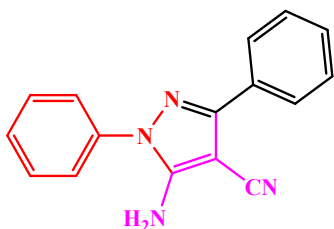

M.p. 159-161°C, FT-IR (KBr,  $\nu$   $\text{cm}^{-1}$ ): 3450, 3313, 3195, 2209, 1637, 1593, 1566, 1494, 1443, 1261, 1136, 1066, 929, 882, 756, 692, 508;  $^1\text{H}$  NMR (250 MHz, DMSO- $d_6$ )  $\delta$  7.83 (s, 2H), 7.63 – 7.46 (m, 2H), 7.39 – 7.16 (m, 4H), 7.04 (s, 2H), 6.73 (s, 2H);  $^{13}\text{C}$  NMR (63 MHz, DMSO)  $\delta$  153.38, 145.76, 136.90, 129.95, 129.54, 129.26, 129.07, 128.34, 126.44, 126.06, 124.79, 119.16, 112.45.

**S11. 4-(5-amino-4-cyano-1-phenyl-1*H*-pyrazol-3-yl)phenyl benzoate (4k)**

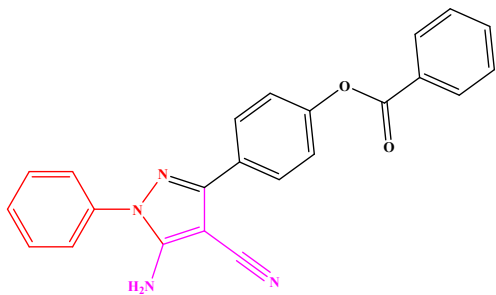

M.p. 225-227 °C, FT-IR (KBr,  $\nu$   $\text{cm}^{-1}$ ): 3485, 3387, 3291, 3179, 3060, 2895, 2201, 1733, 1643, 1570, 1500, 1450, 1410, 1355, 1311, 1249, 1129, 1081, 918, 885, 815, 752, 701, 531, 509;  $^1\text{H}$  NMR (250 MHz,  $\text{DMSO-}d_6$ )  $\delta$  8.26 – 8.00 (m, 2H), 7.87 (s, 1H), 7.80 – 7.68 (m, 2H), 7.58 (s, 5H), 7.29 (s, 2H), 7.07 (s, 2H), 6.73 (s, 2H);  $^{13}\text{C}$  NMR (63 MHz,  $\text{DMSO}$ )  $\delta$  160.64, 153.35, 151.82, 146.13, 132.90, 131.56, 130.74, 129.98, 129.53, 128.53, 124.80, 122.62, 119.14, 115.92.



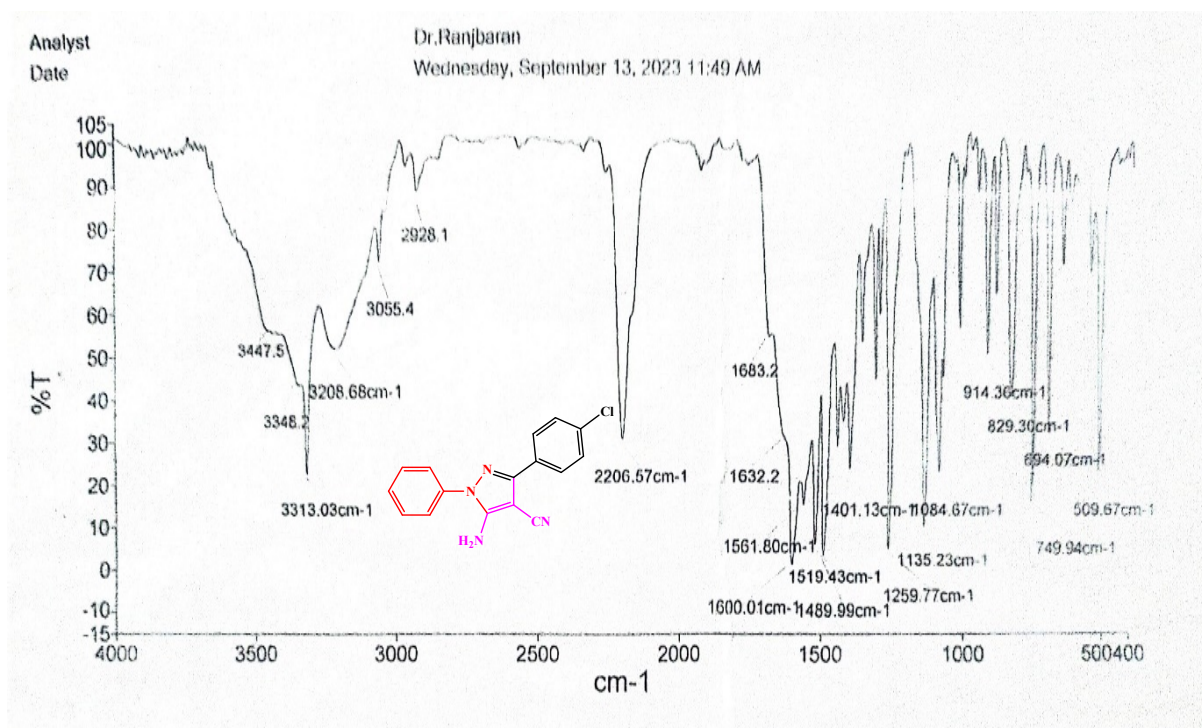

**Fig. S1.** The FTIR spectrum of 5-amino-3-(4-chlorophenyl)-1-phenyl-1H-pyrazole-4-carbonitrile

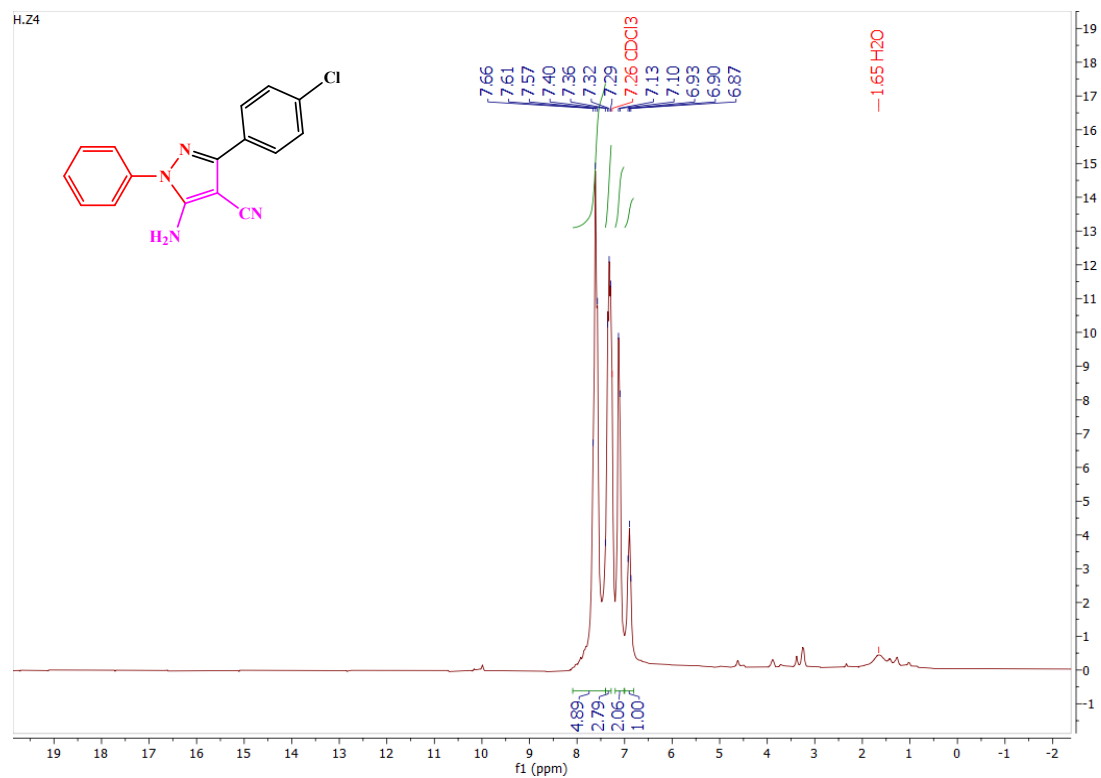

**Fig. S2.** The <sup>1</sup>H NMR spectrum of 5-amino-3-(4-chlorophenyl)-1-phenyl-1*H*-pyrazole-4-carbonitrile in CDCl<sub>3</sub> solvent

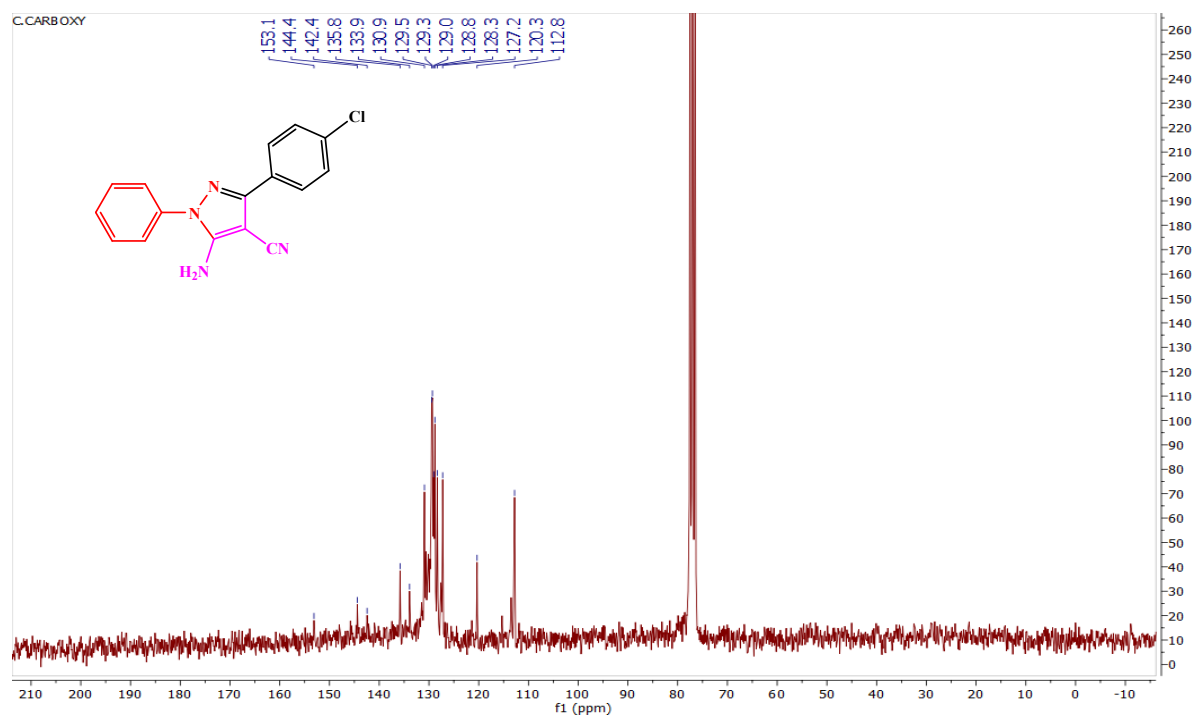

**Fig. S3.** The <sup>13</sup>C NMR spectrum of 5-amino-3-(4-chlorophenyl)-1-phenyl-1*H*-pyrazole-4-carbonitrile in CDCl<sub>3</sub> solvent

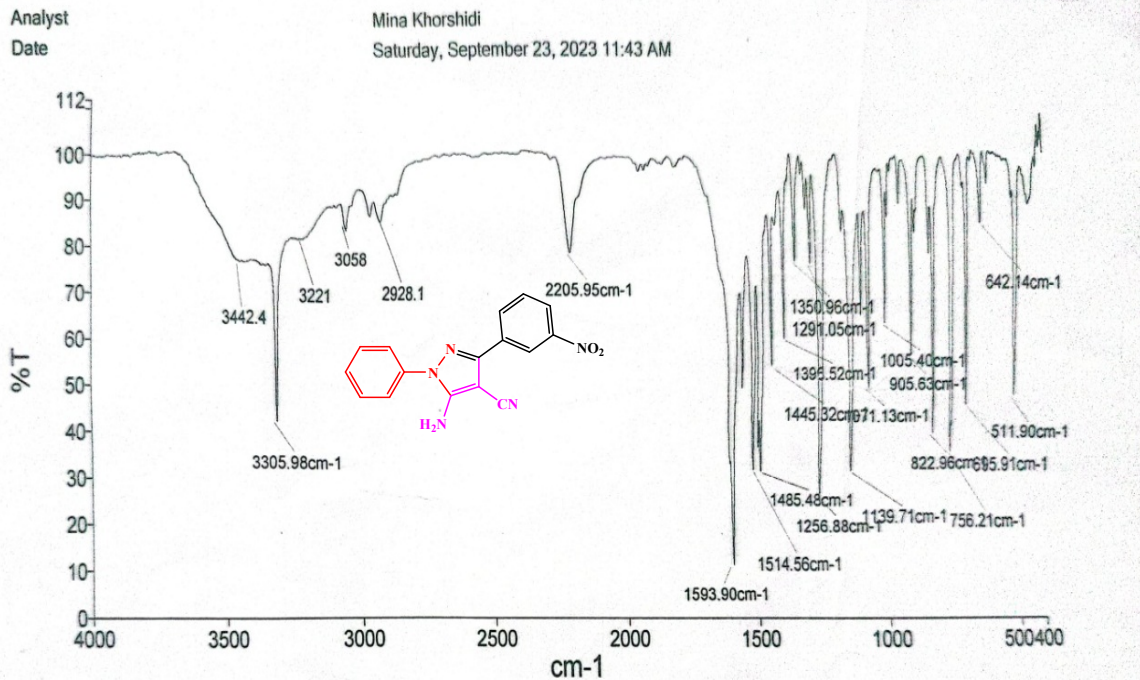

**Fig. S4.** The FTIR spectrum of 5-amino-3-(3-nitrophenyl)-1-phenyl-1*H*-pyrazole-4-carbonitrile

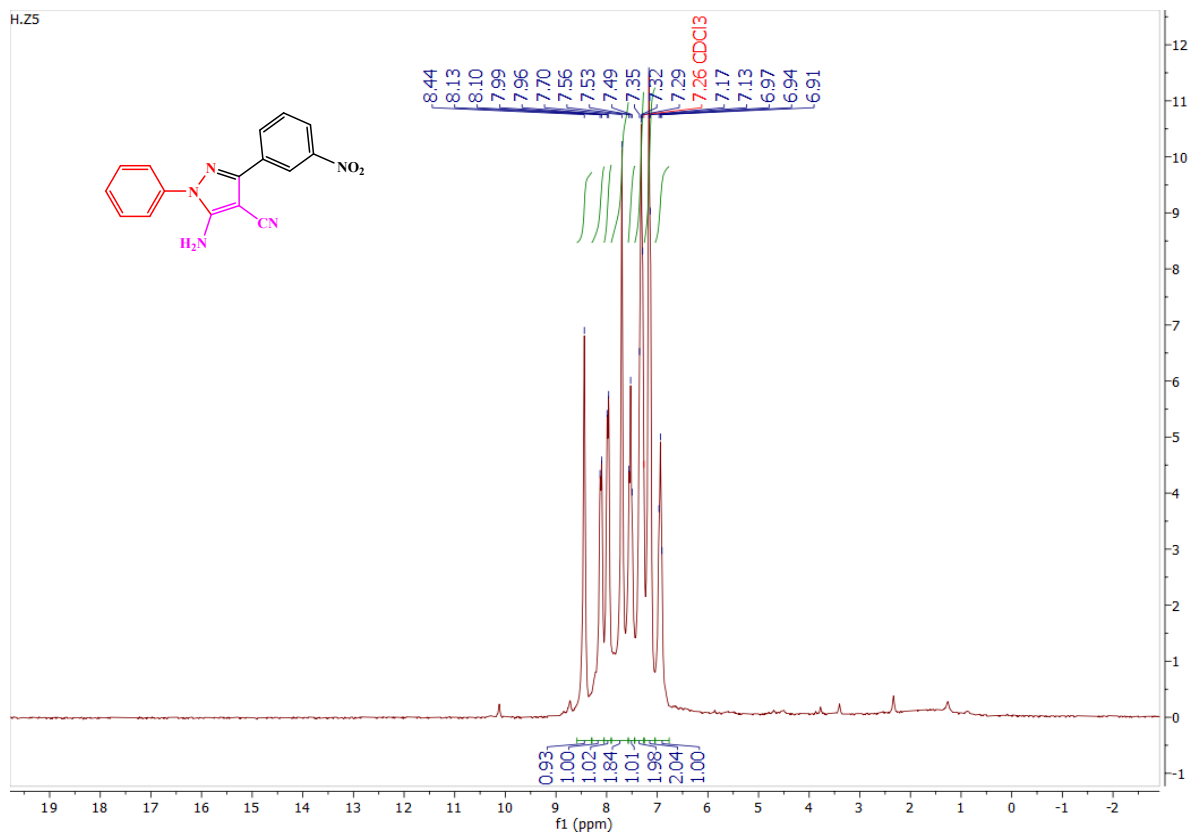

**Fig. S5.** The <sup>1</sup>H NMR spectrum of 5-amino-3-(3-nitrophenyl)-1-phenyl-1*H*-pyrazole-4-carbonitrile in CDCl<sub>3</sub> solvent

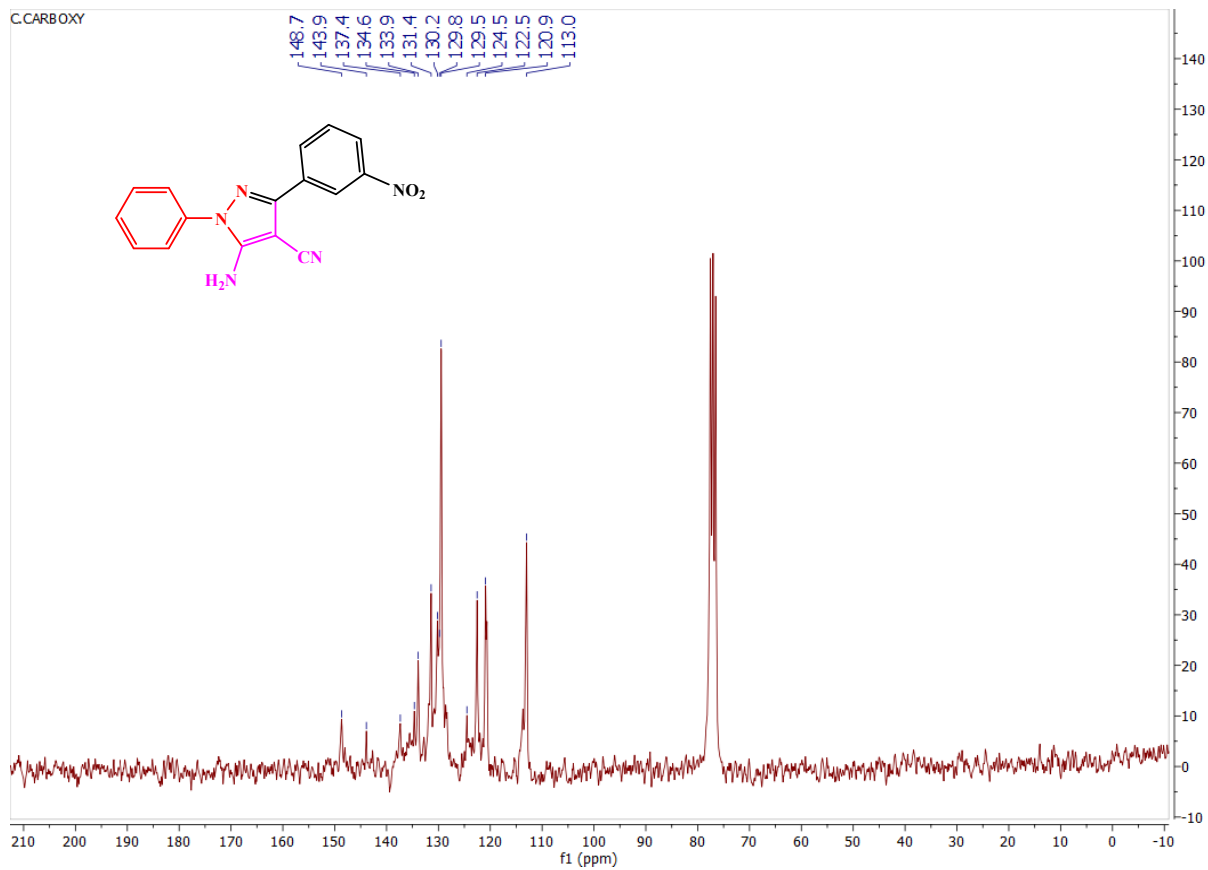

**Fig. S6.** The  $^{13}\text{C}$  NMR spectrum of 5-amino-3-(3-nitrophenyl)-1-phenyl-1H-pyrazole-4-carbonitrile in  $\text{CDCl}_3$  solvent

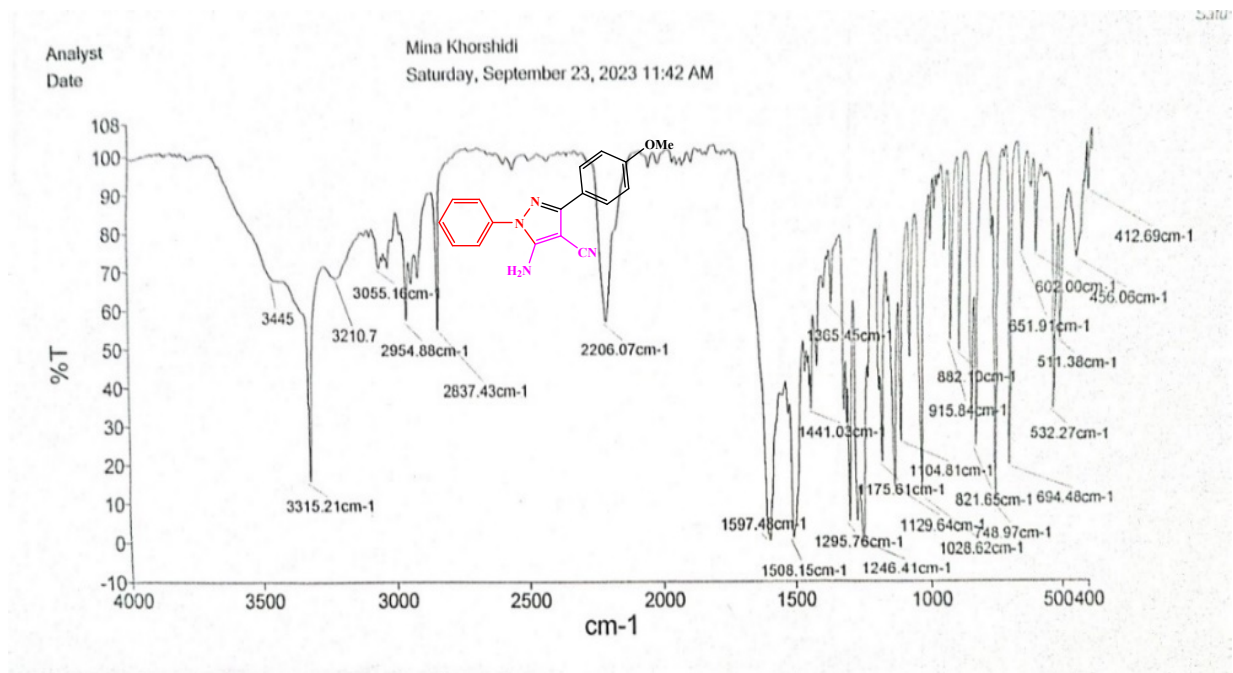

**Fig. S7.** The FTIR spectrum of 5-amino-3-(4-methoxyphenyl)-1-phenyl-1H-pyrazole-4-carbonitrile

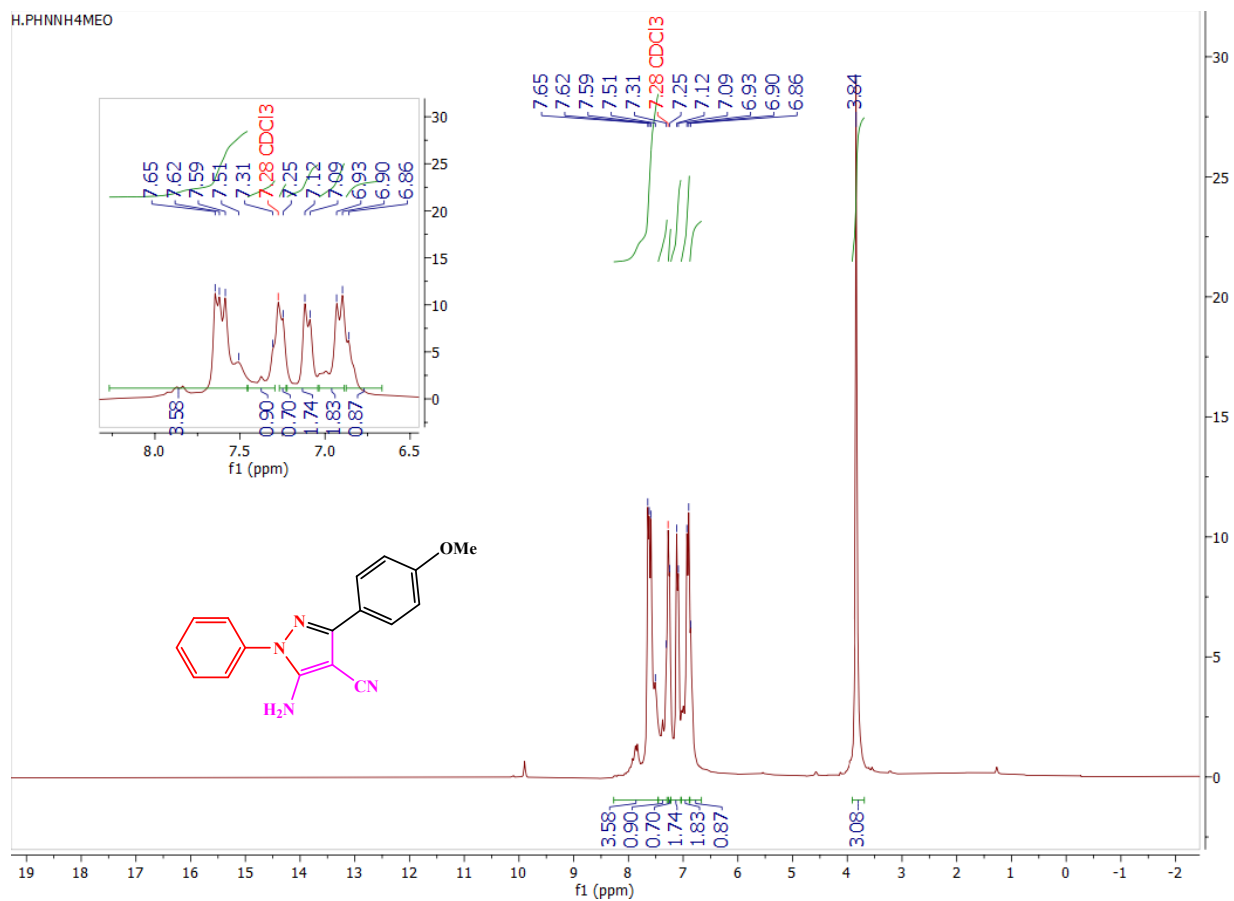

**Fig. S8.** The  $^1\text{H}$  NMR spectrum of 5-amino-3-(4-methoxyphenyl)-1-phenyl-1H-pyrazole-4-carbonitrile in  $\text{CDCl}_3$  solvent

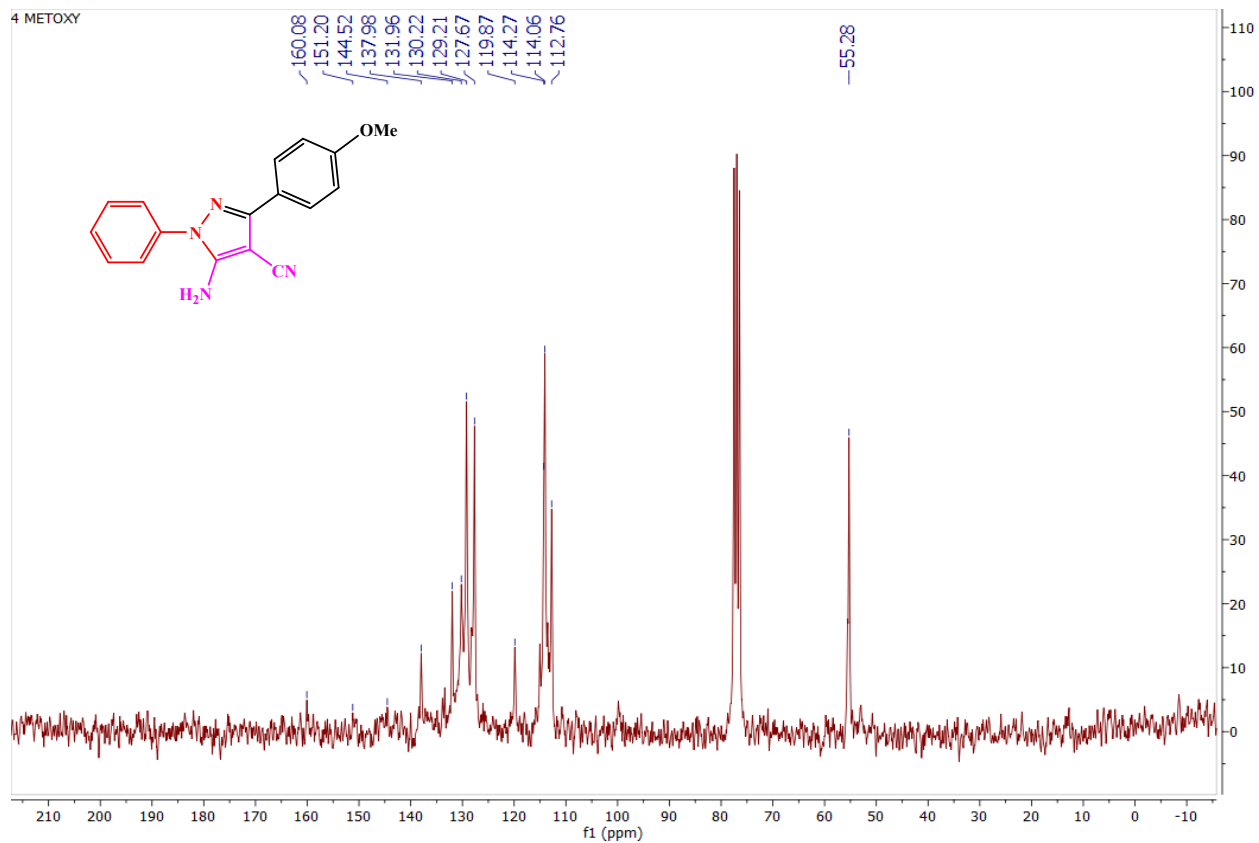

**Fig. S9.** The  $^{13}\text{C}$  NMR spectrum of 5-amino-3-(4-methoxyphenyl)-1-phenyl-1*H*-pyrazole-4-carbonitrile in  $\text{CDCl}_3$  solvent

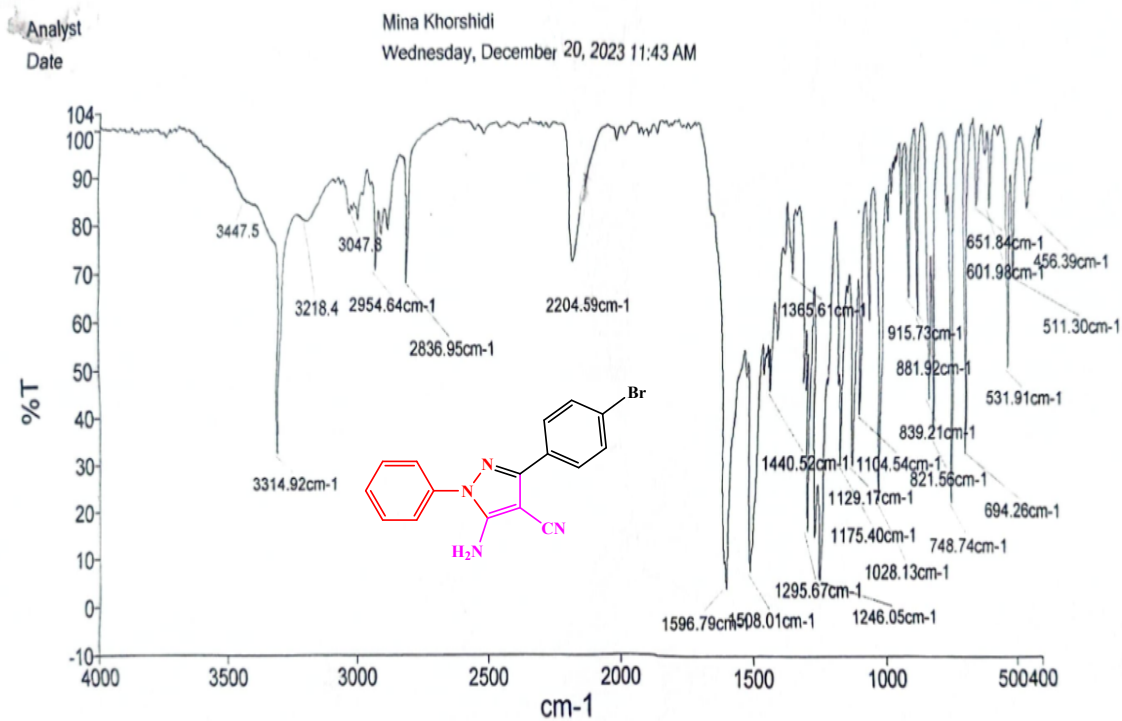

**Fig. S10.** The FTIR spectrum of 5-amino-3-(4-bromophenyl)-1-phenyl-1H-pyrazole-4-carbonitrile



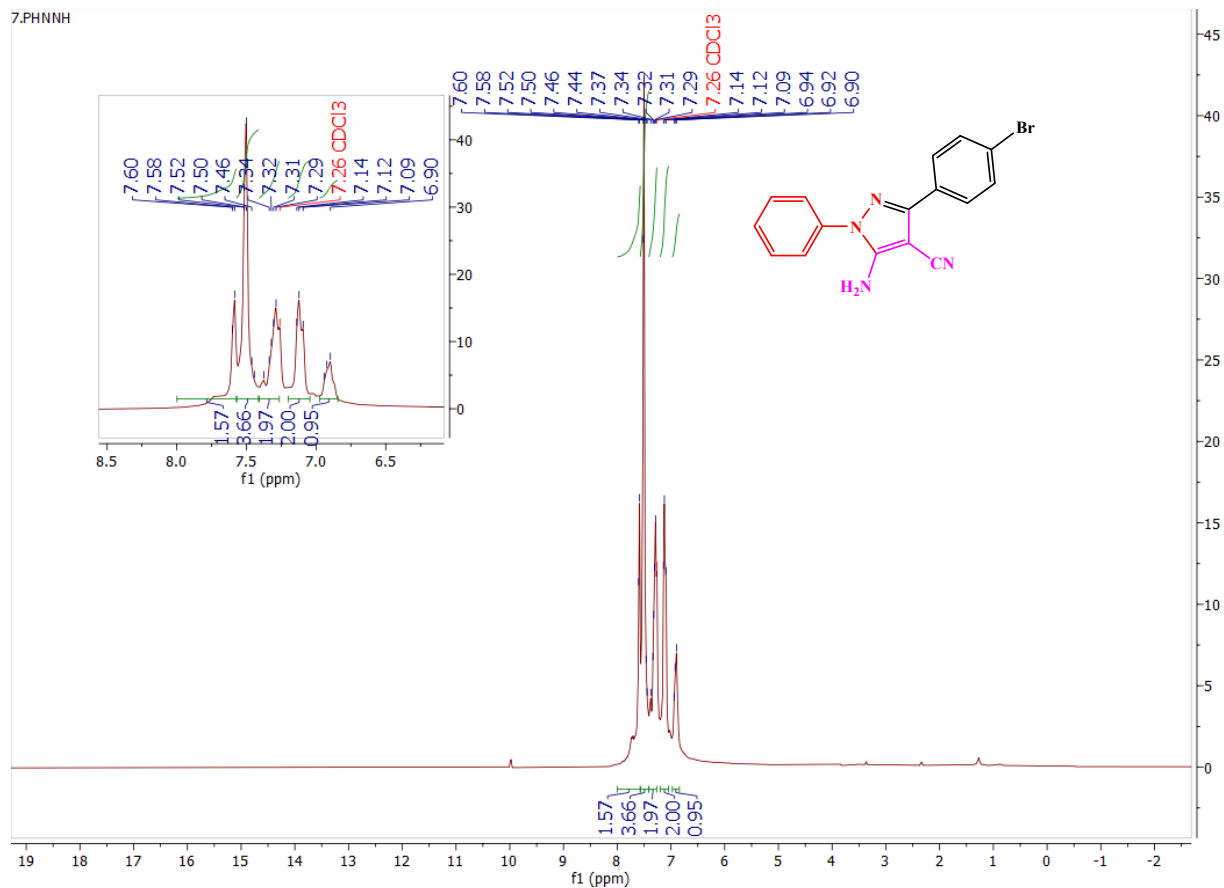

**Fig. S11.** The  $^1\text{H}$  NMR spectrum of 5-amino-3-(4-bromophenyl)-1-phenyl-1H-pyrazole-4-carbonitrile in  $\text{CDCl}_3$  solvent

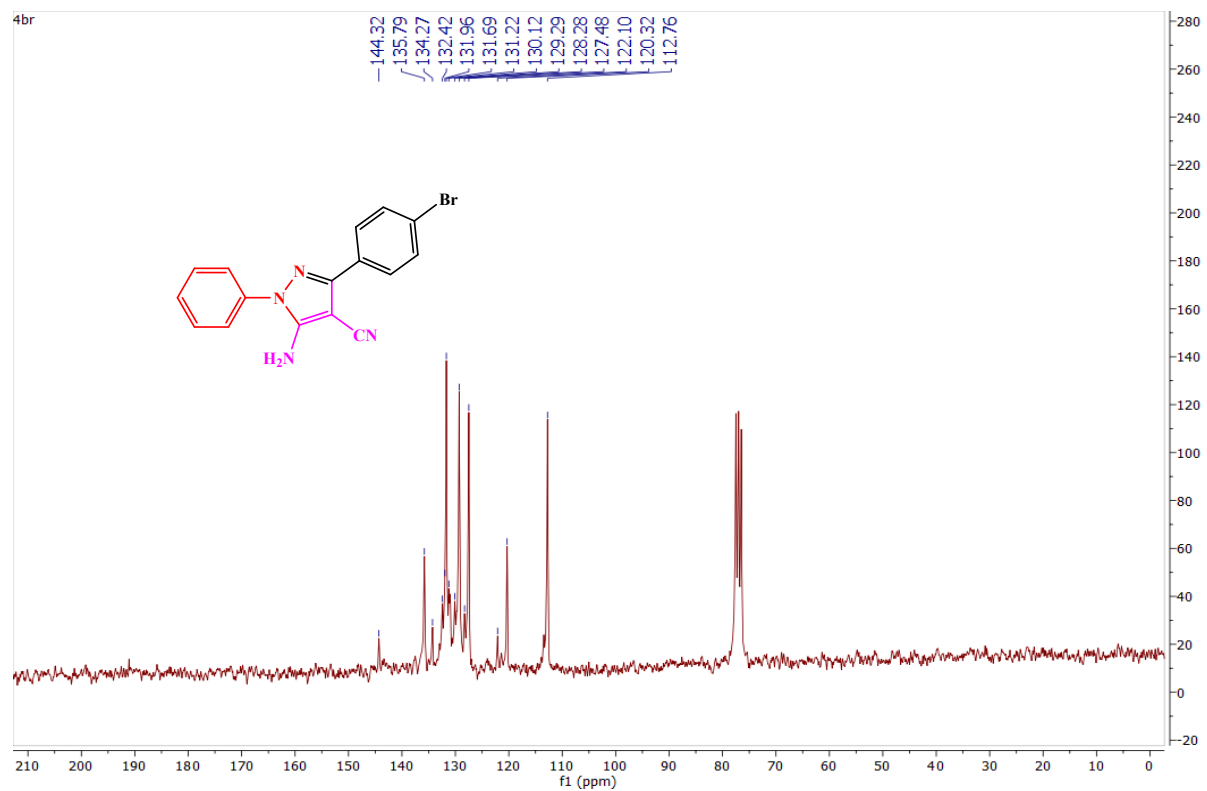

**Fig. S12.** The  $^{13}\text{C}$  NMR spectrum of 5-amino-3-(4-bromophenyl)-1-phenyl-1H-pyrazole-4-carbonitrile in  $\text{CDCl}_3$  solvent

Analyst  
Date

Mina Khorshidi  
Tuesday, November 14, 2023 11:51 AM

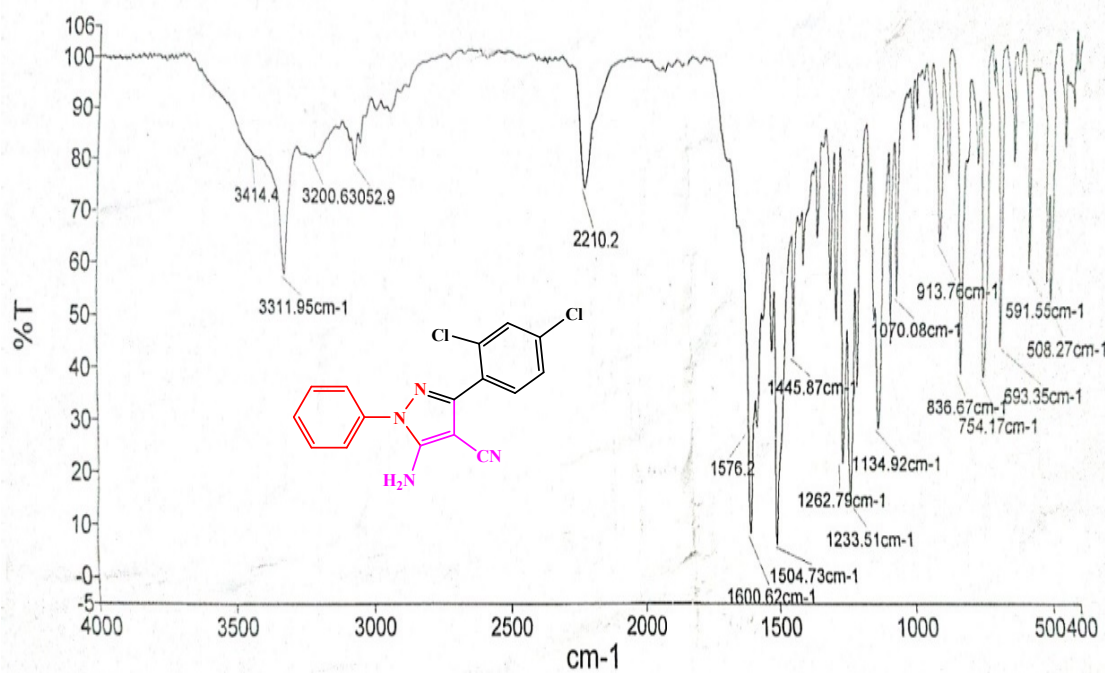

**Fig. S13.** The FTIR spectrum of 5-amino-3-(2,4-dichlorophenyl)-1-phenyl-1H-pyrazole-4-carbonitrile

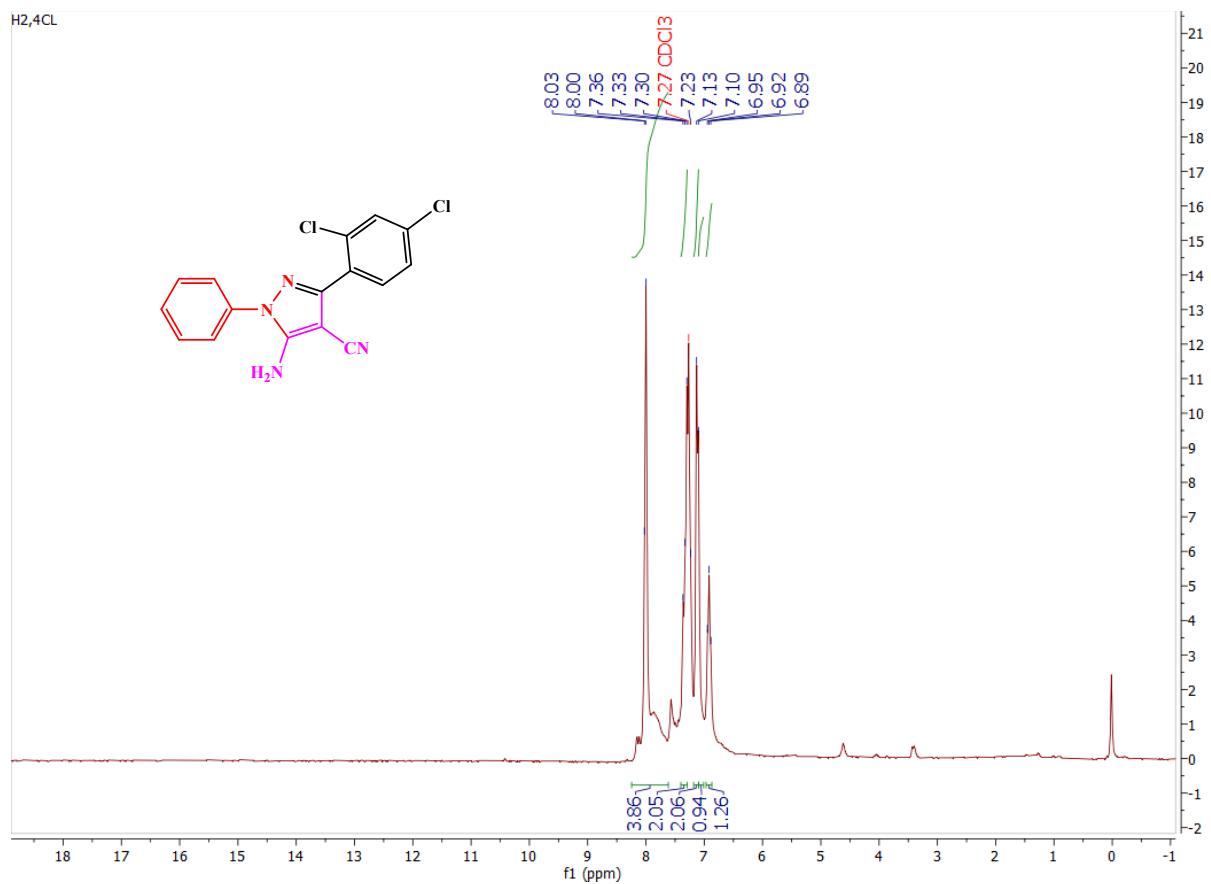

**Fig. S14.** The <sup>1</sup>H NMR spectrum of 5-amino-3-(2,4-dichlorophenyl)-1-phenyl-1H-pyrazole-4-carbonitrile in CDCl<sub>3</sub> solvent

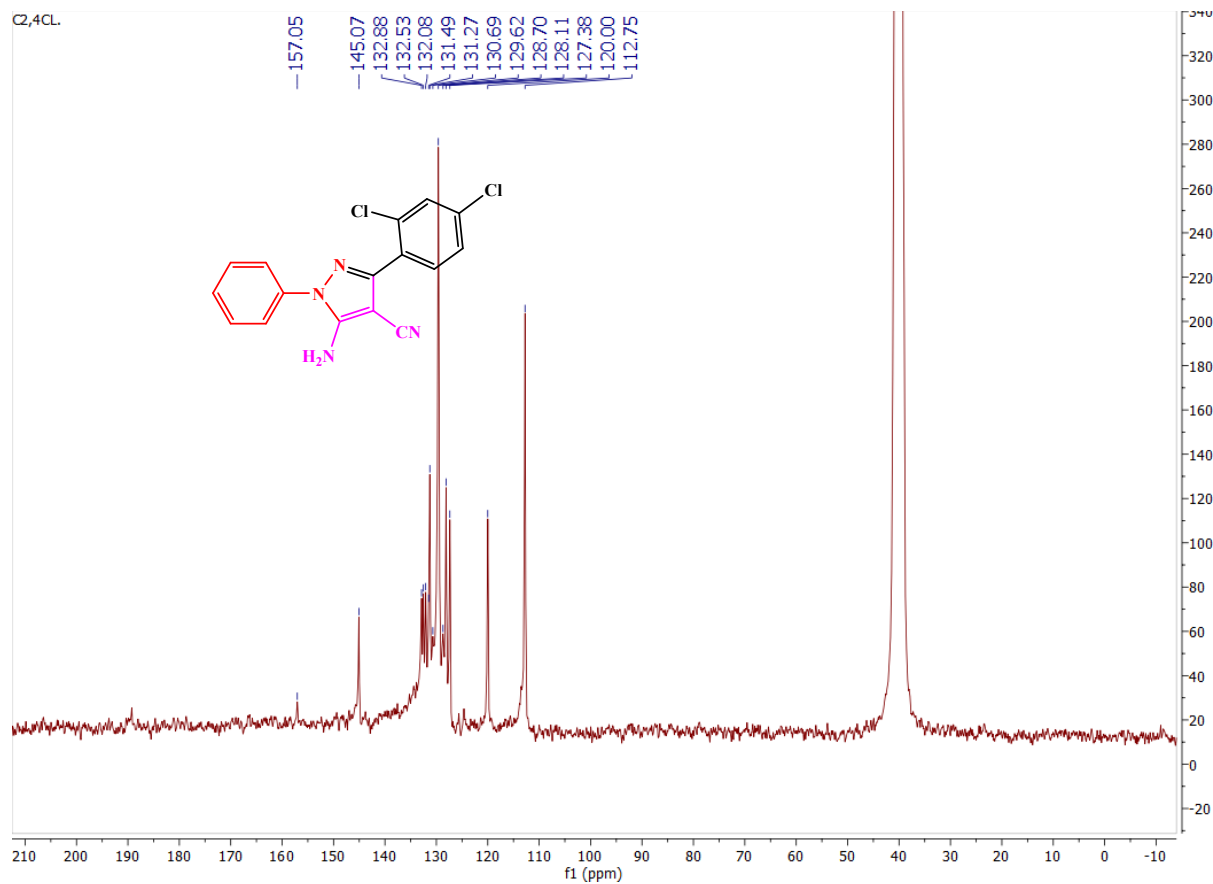

**Fig. S15.** The  $^{13}\text{C}$  NMR spectrum of 5-amino-3-(2,4-dichlorophenyl)-1-phenyl-1*H*-pyrazole-4-carbonitrile in DMSO solvent

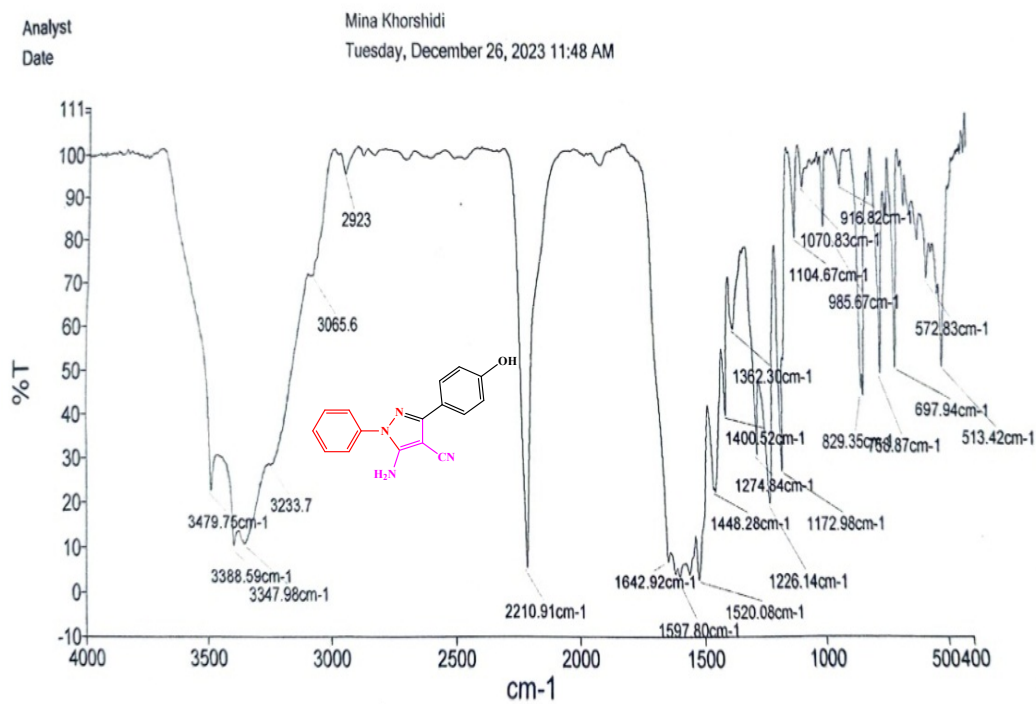

**Fig. S16.** The FTIR spectrum of 5-amino-3-(4-hydroxyphenyl)-1-phenyl-1H-pyrazole-4-carbonitrile

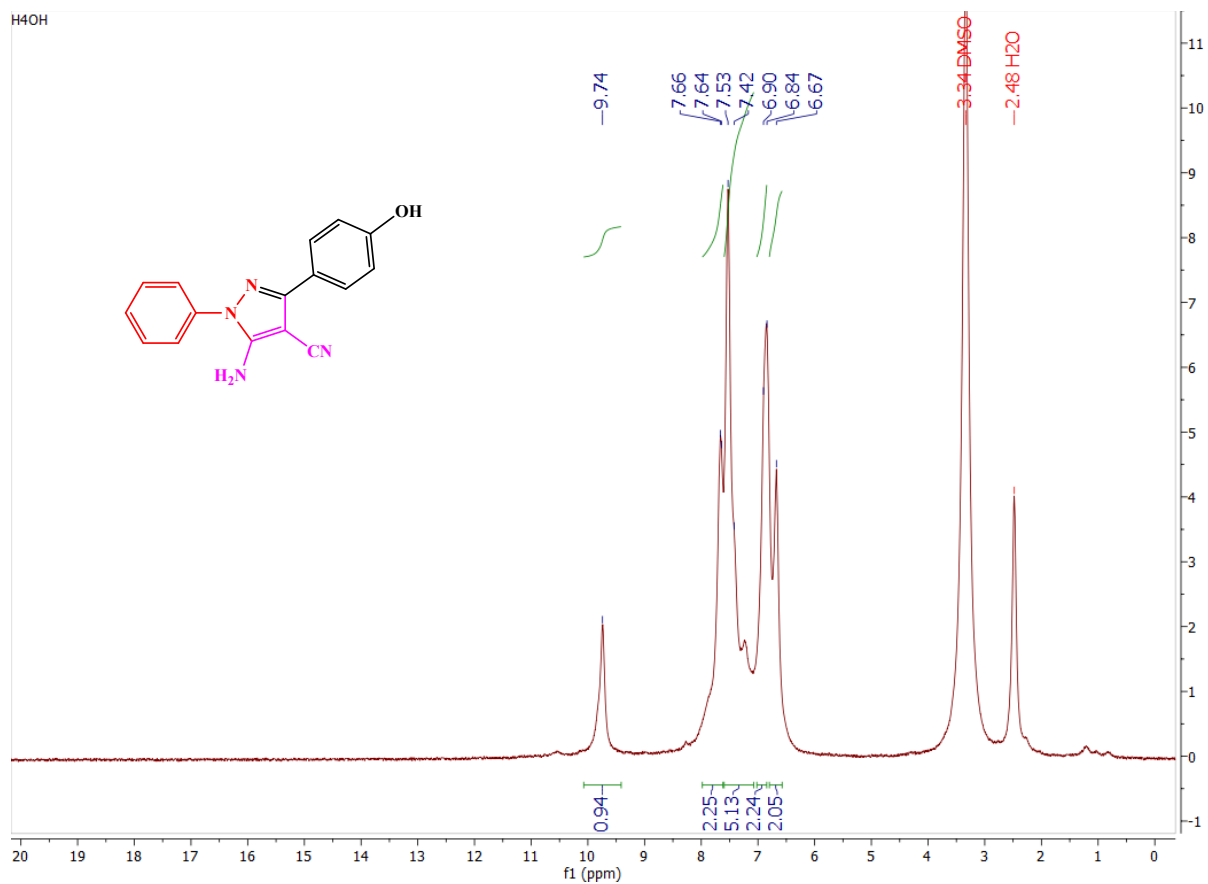

**Fig. S17.** The <sup>1</sup>H NMR spectrum of 5-amino-3-(4-hydroxyphenyl)-1-phenyl-1H-pyrazole-4-carbonitrile in DMSO solvent

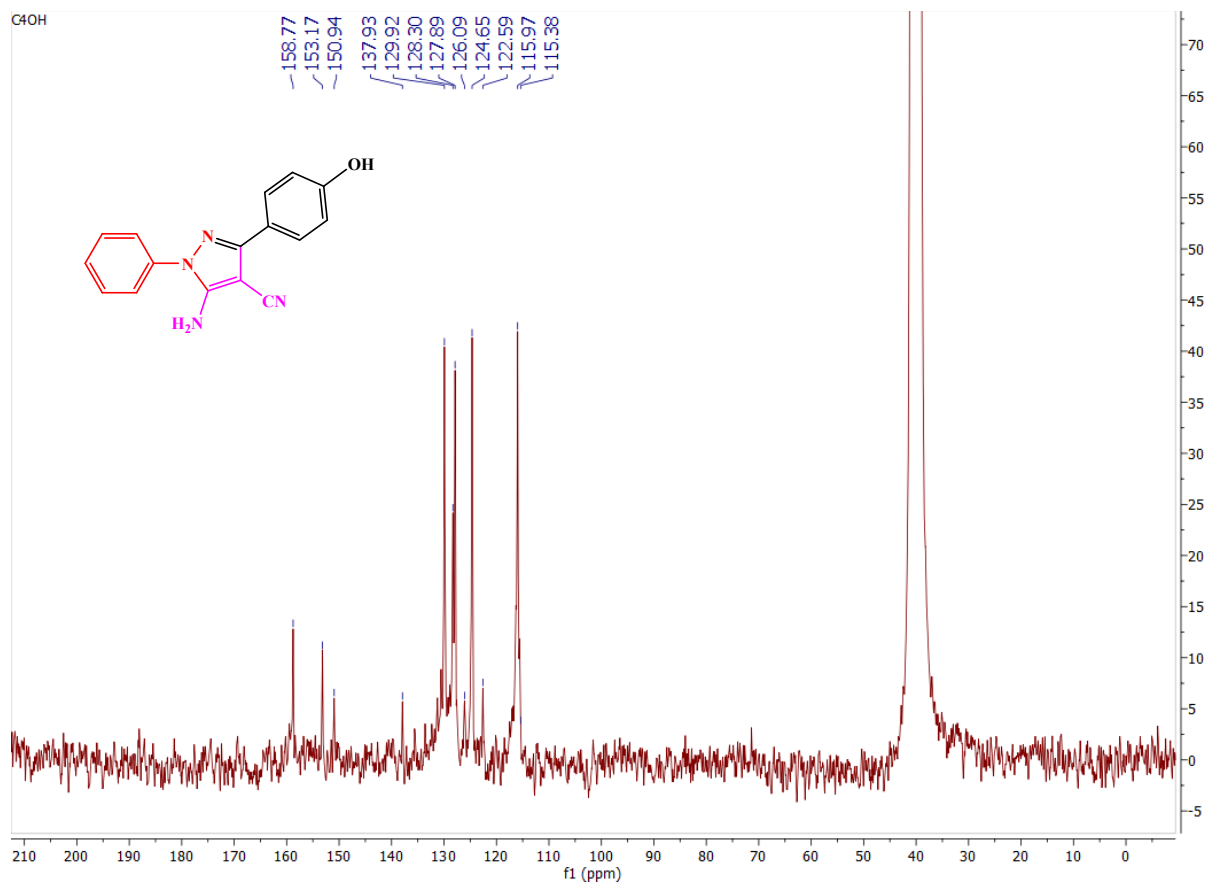

**Fig. S18.** The  $^{13}\text{C}$  NMR spectrum of 5-amino-3-(4-hydroxyphenyl)-1-phenyl-1*H*-pyrazole-4-carbonitrile in DMSO solvent

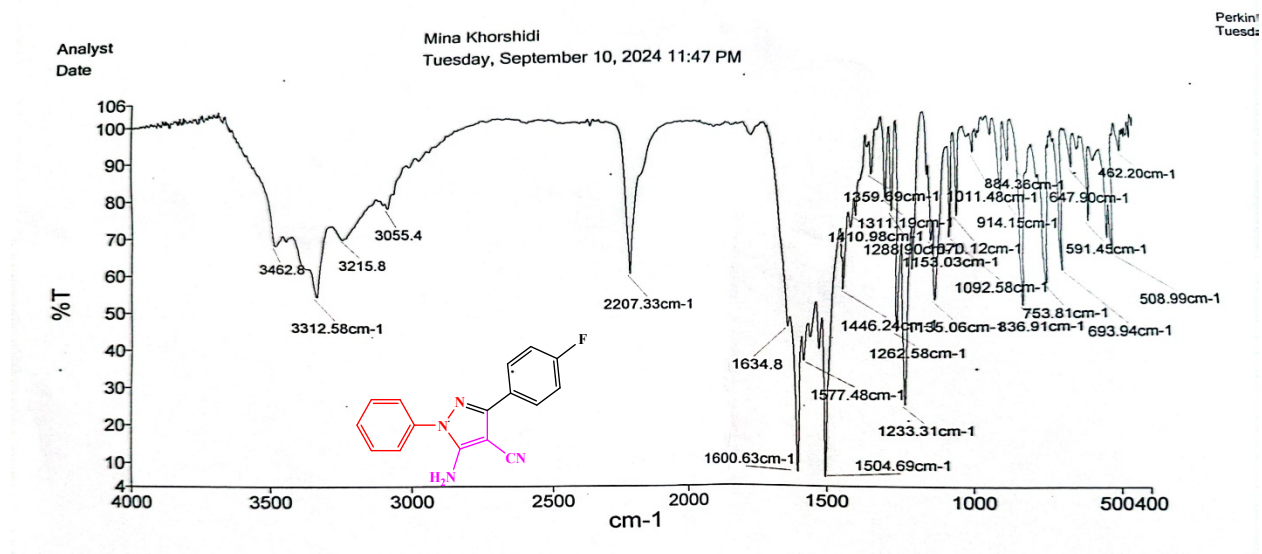

**Fig. S19.** The FTIR spectrum of 5-amino-3-(4-fluorophenyl)-1-phenyl-1*H*-pyrazole-4-carbonitrile



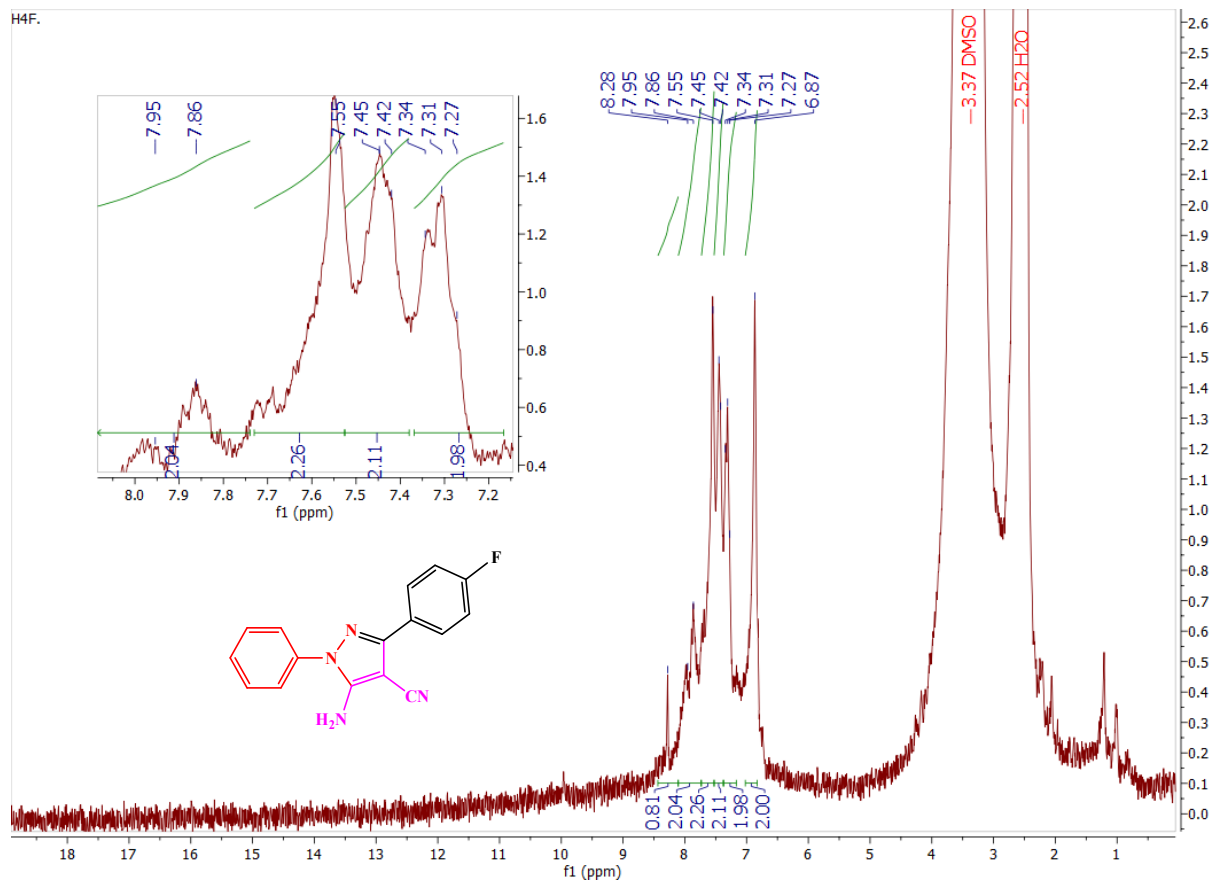

**Fig. S20.** The <sup>1</sup>H NMR spectrum of 5-amino-3-(4-fluorophenyl)-1-phenyl-1H-pyrazole-4-carbonitrile in DMSO solvent

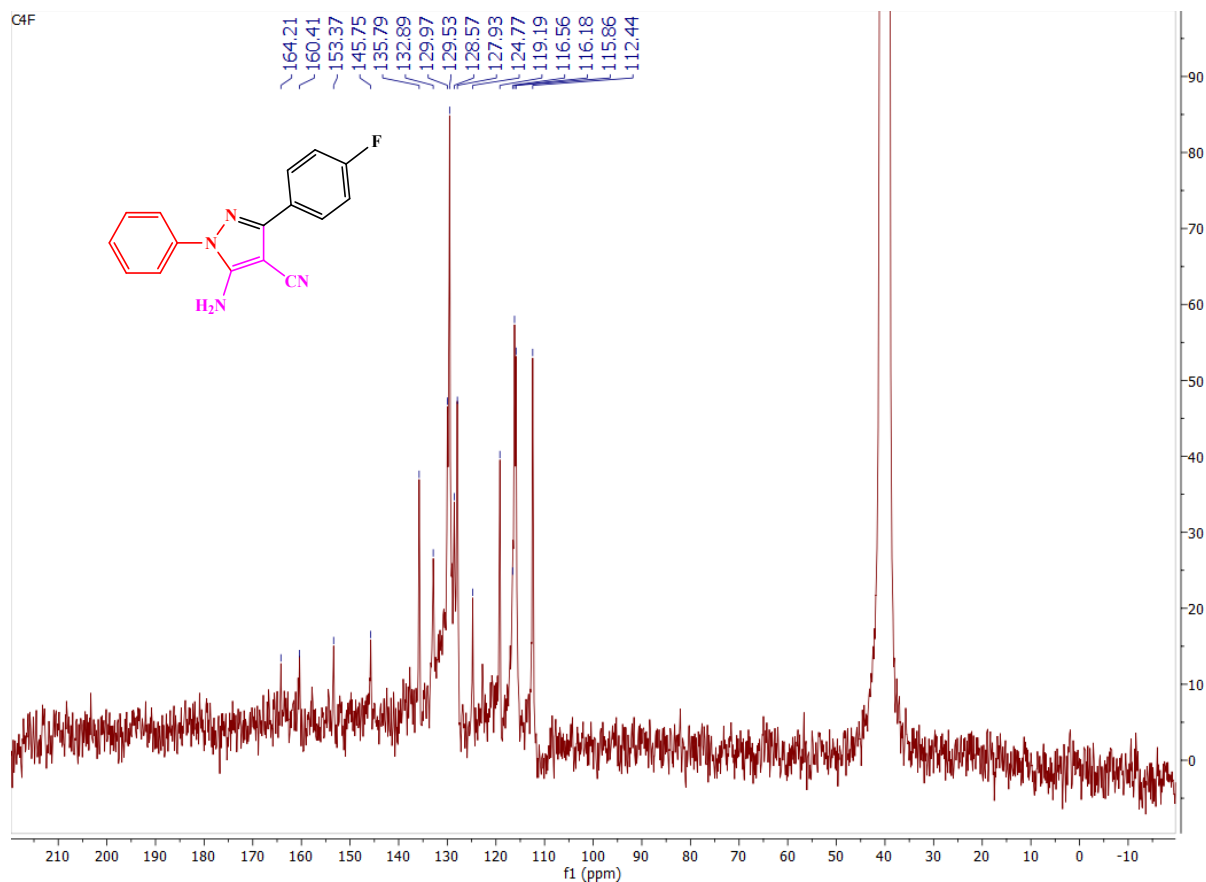

**Fig. S21.** The  $^{13}\text{C}$  NMR spectrum of 5-amino-3-(4-fluorophenyl)-1-phenyl-1*H*-pyrazole-4-carbonitrile in DMSO solvent

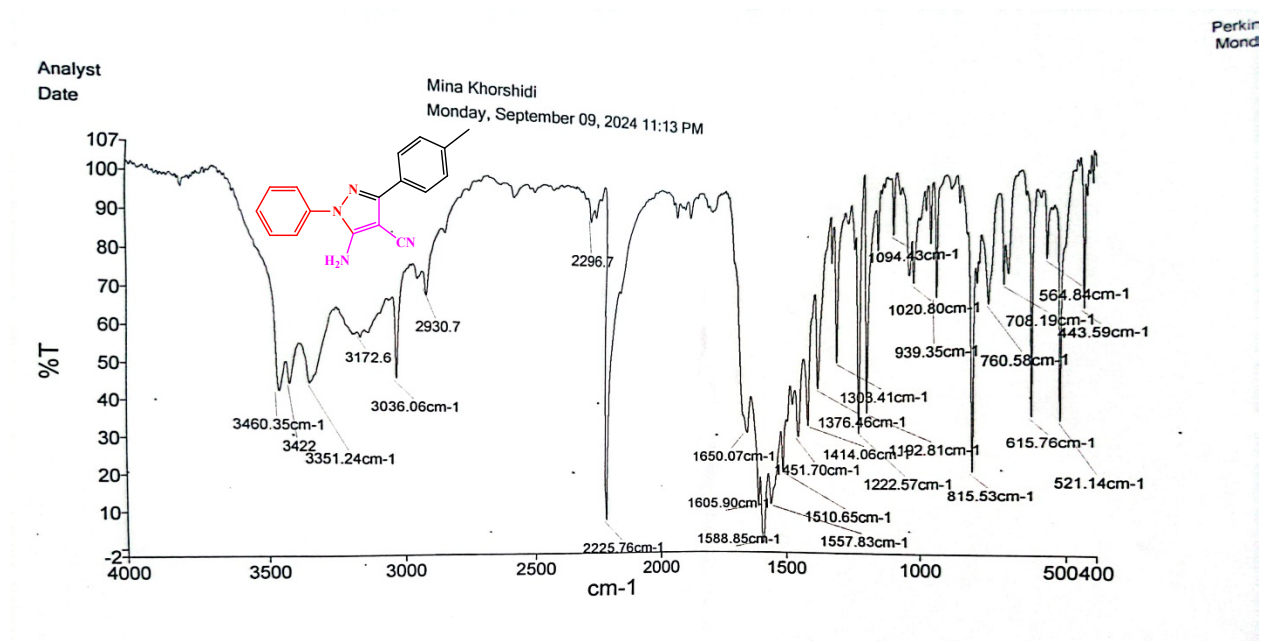

**Fig. S22.** The FTIR spectrum of 5-amino-1-phenyl-3-(p-tolyl)-1*H*-pyrazole-4-carbonitrile

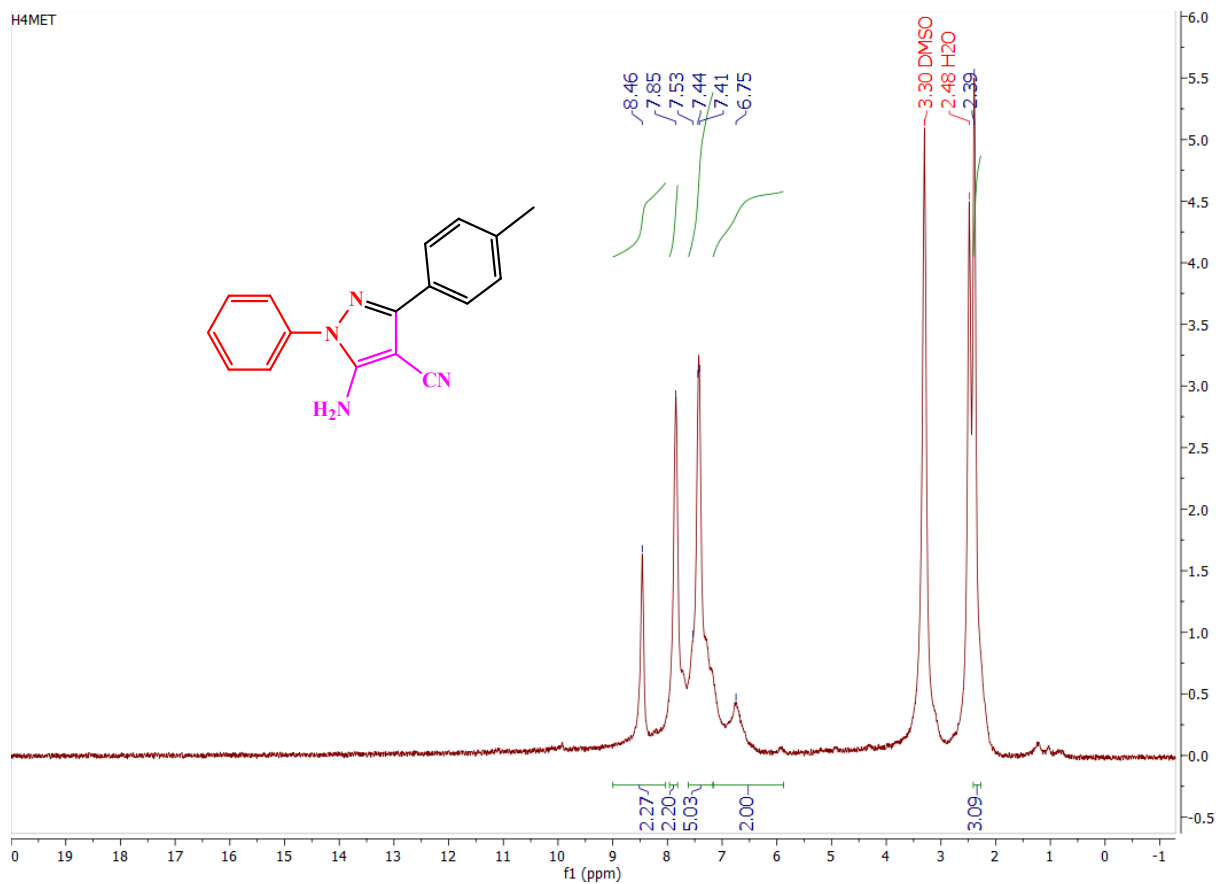

**Fig. S23.** The <sup>1</sup>H NMR spectrum of 5-amino-1-phenyl-3-(p-tolyl)-1H-pyrazole-4-carbonitrile in DMSO solvent

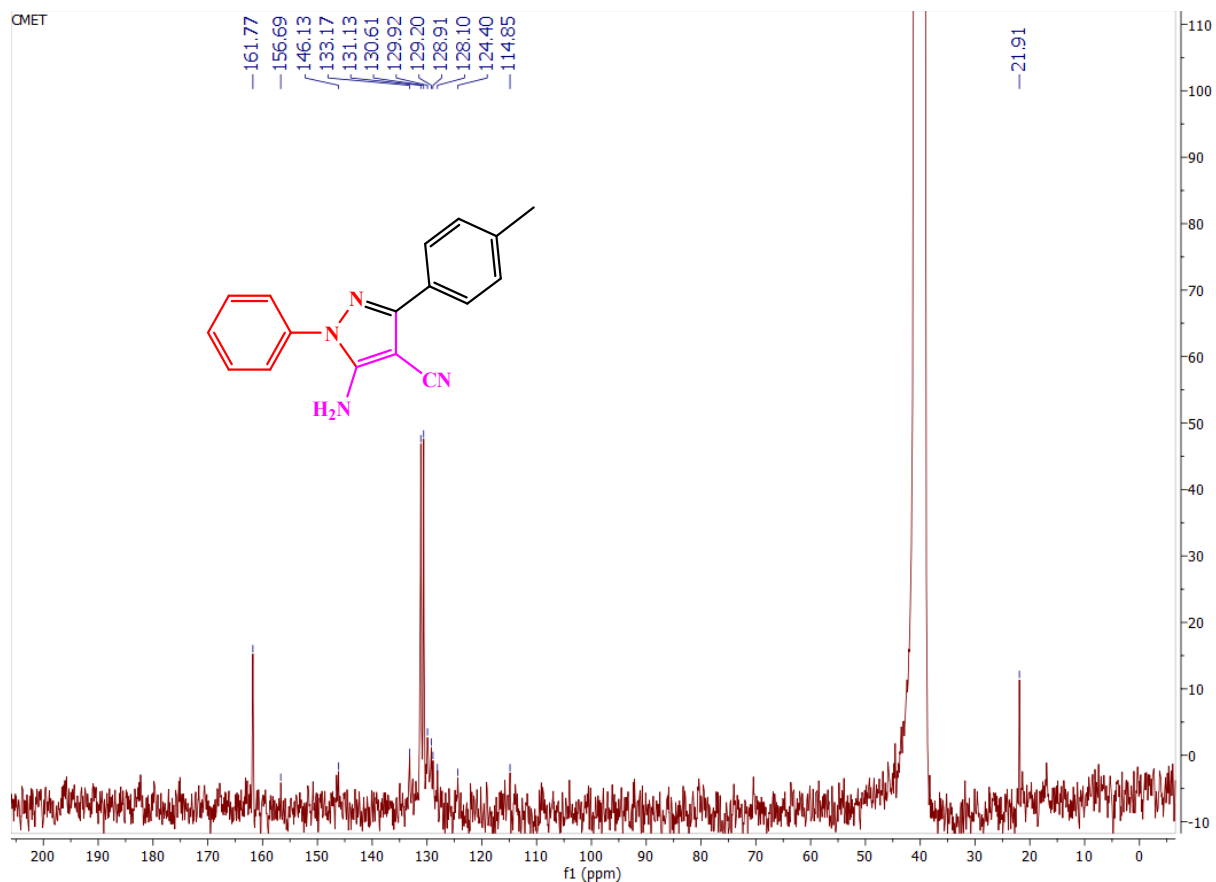

Fig. S24. The  $^{13}\text{C}$  NMR spectrum of 5-amino-1-phenyl-3-(p-tolyl)-1H-pyrazole-4-carbonitrile in DMSO solvent

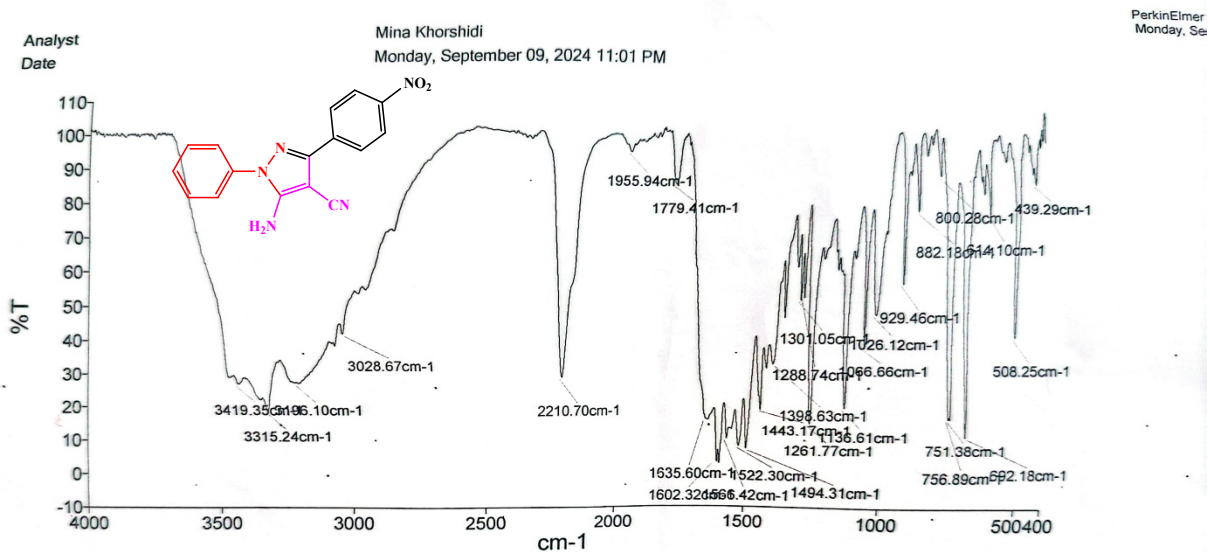

Fig. S25. The FTIR spectrum of 5-amino-3-(4-nitrophenyl)-1-phenyl-1H-pyrazole-4-carbonitrile

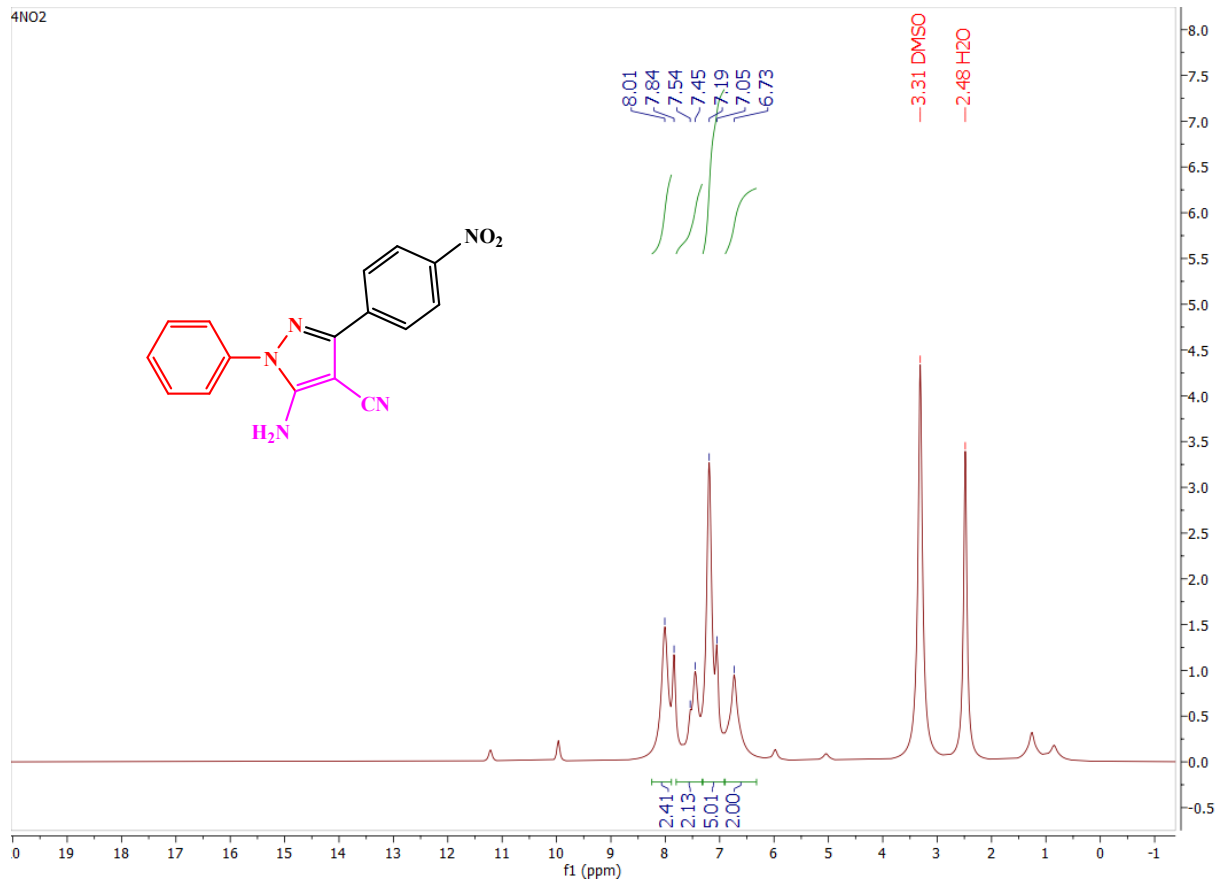

**Fig. S26.** The  $^1\text{H}$  NMR spectrum of 5-amino-3-(4-nitrophenyl)-1-phenyl-1*H*-pyrazole-4-carbonitrile in DMSO solvent

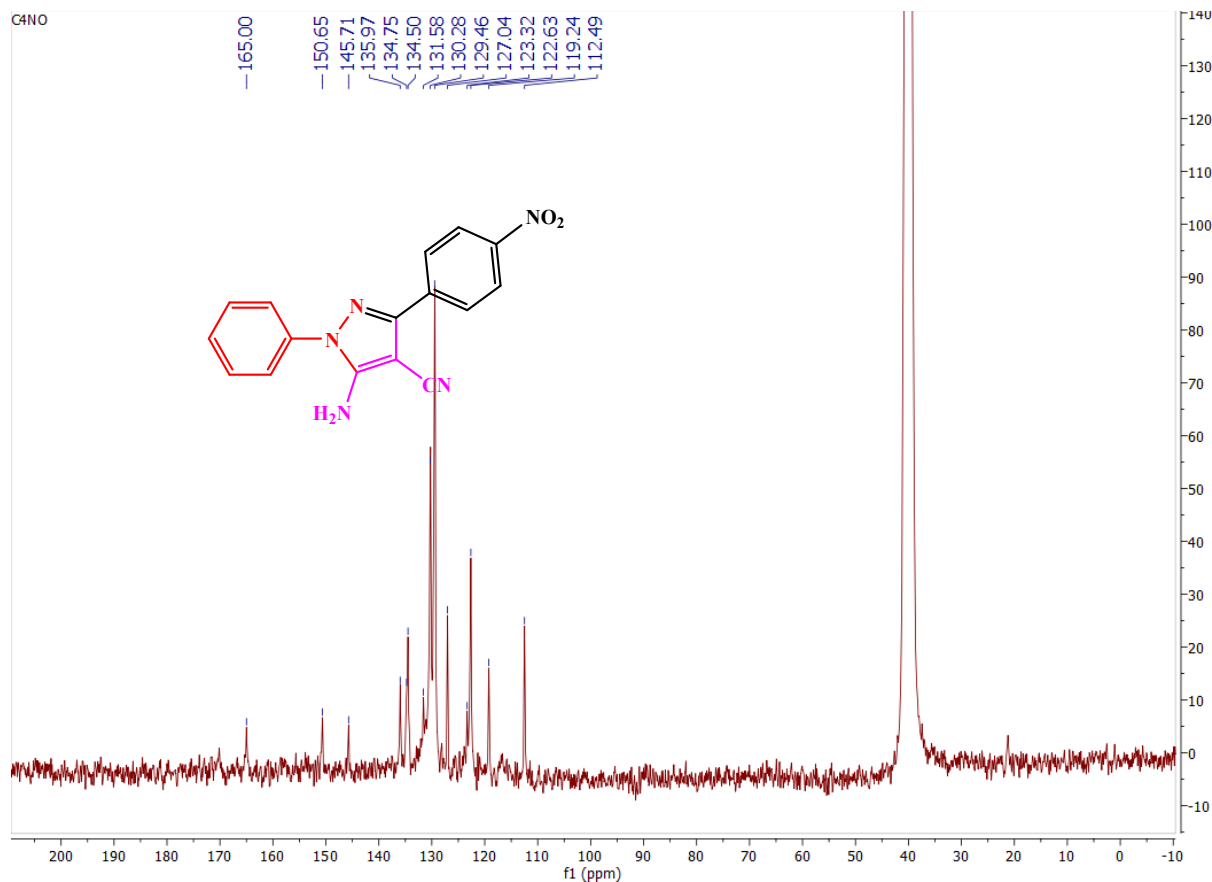

Fig. S27. The  $^{13}\text{C}$  NMR spectrum of 5-amino-3-(4-nitrophenyl)-1-phenyl-1H-pyrazole-4-carbonitrile in DMSO solvent

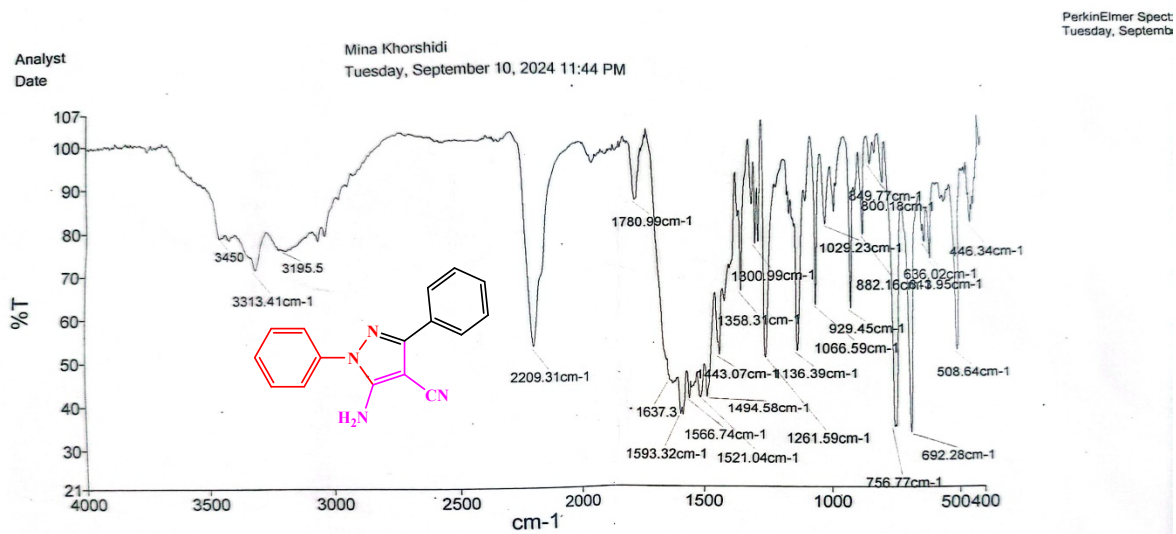

Fig. S28. The FTIR spectrum of 5-amino-1,3-diphenyl-1H-pyrazole-4-carbonitrile

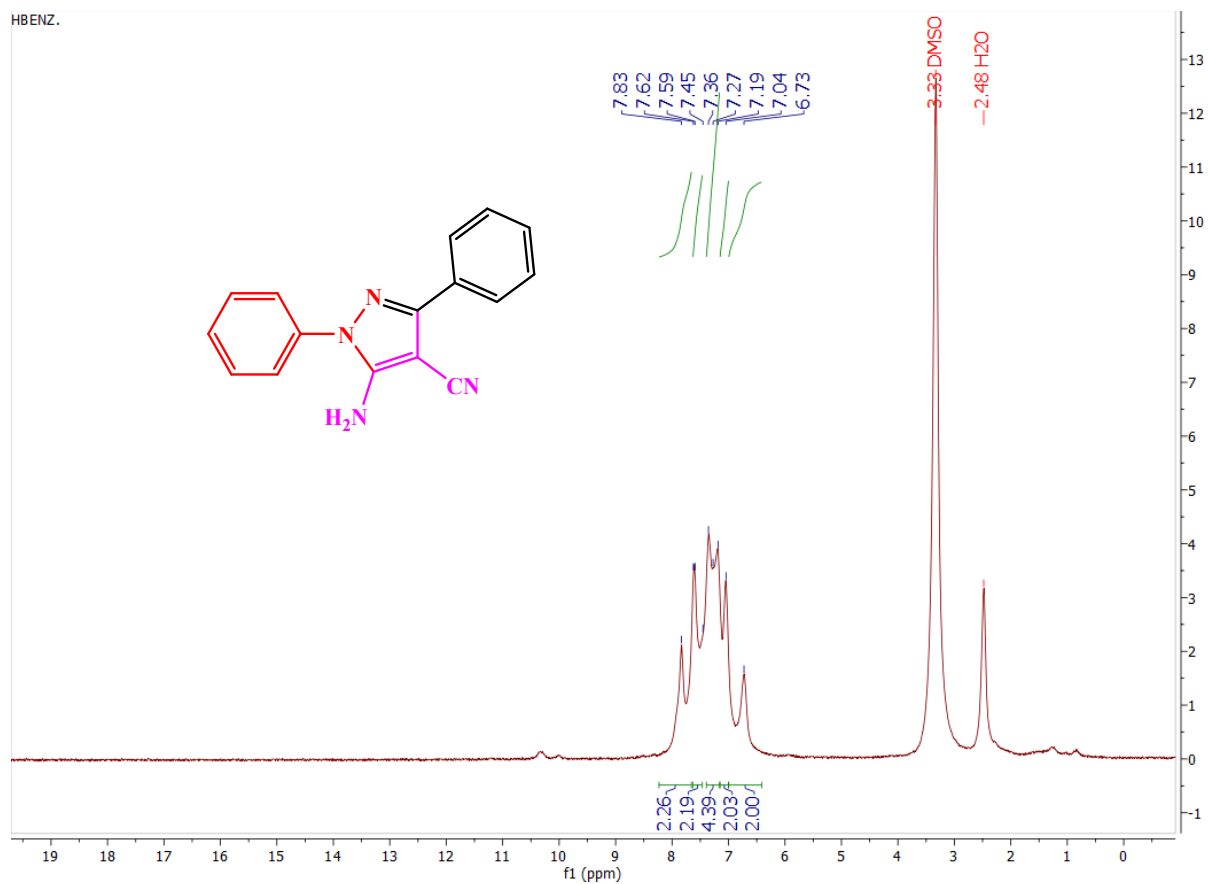

**Fig. S29.** The <sup>1</sup>H NMR spectrum of 5-amino-1,3-diphenyl-1H-pyrazole-4-carbonitrile in DMSO solvent

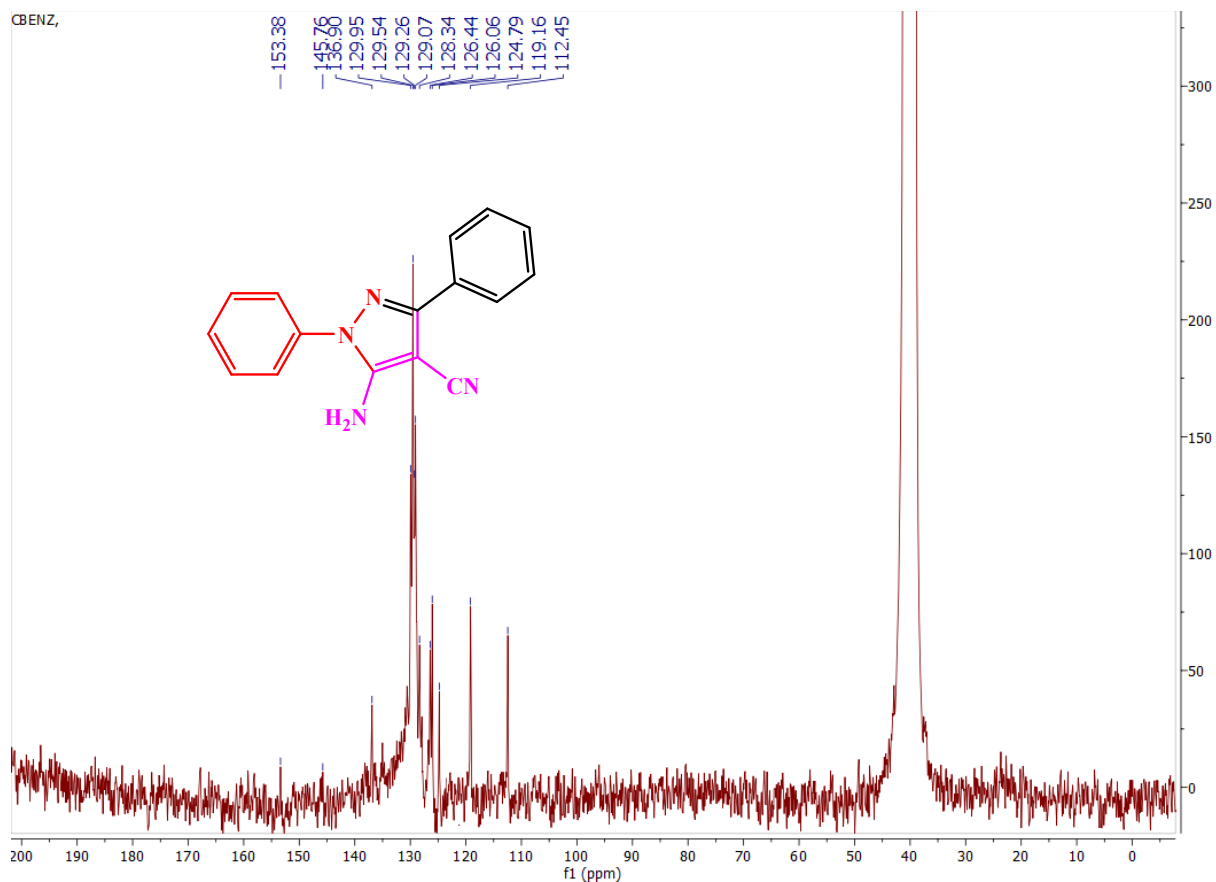

Fig. S30. The  $^{13}\text{C}$  NMR spectrum of 5-amino-1,3-diphenyl-1*H*-pyrazole-4-carbonitrile in DMSO solvent

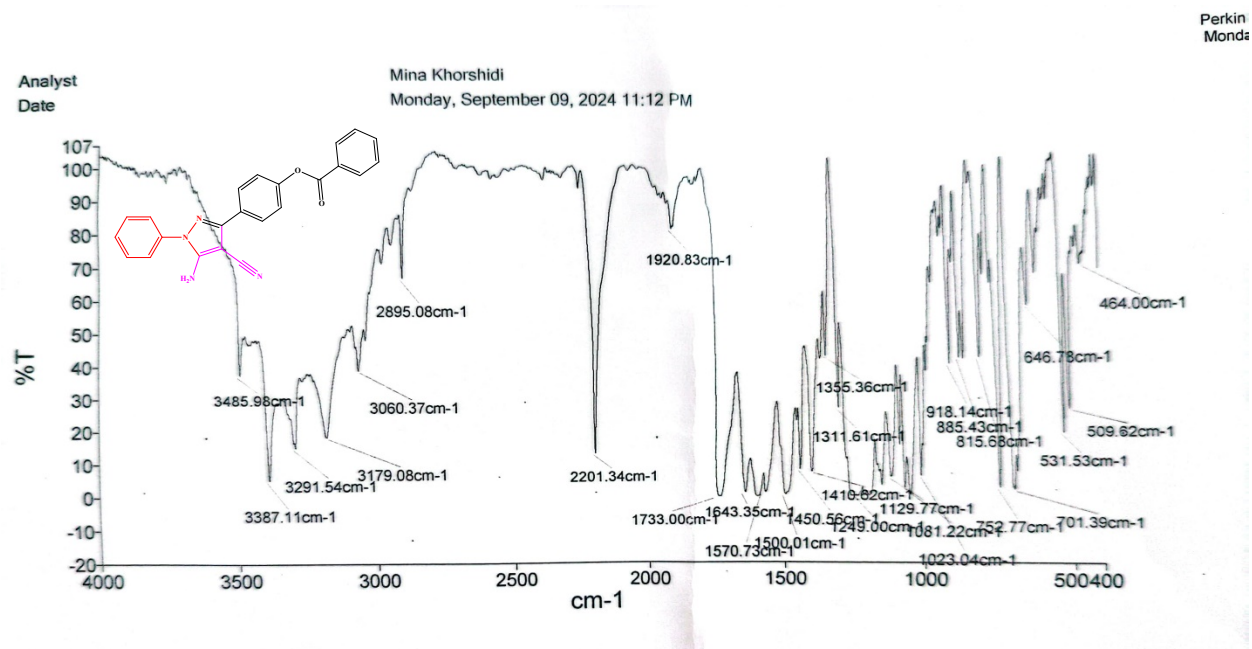

Fig. S31. The FTIR spectrum of 4-(5-amino-4-cyano-1-phenyl-1*H*-pyrazol-3-yl)phenyl benzoate



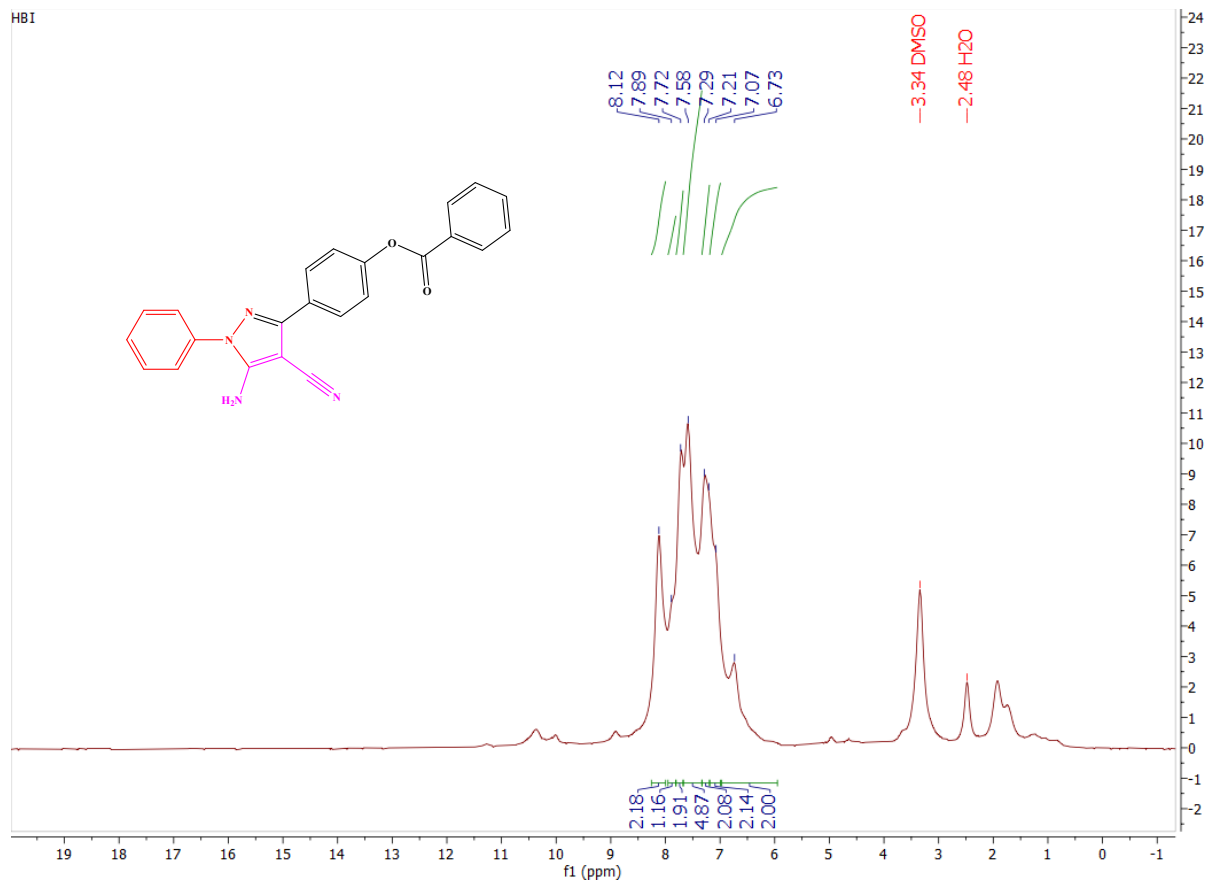

**Fig. S32.** The <sup>1</sup>H NMR spectrum of 4-(5-amino-4-cyano-1-phenyl-1H-pyrazol-3-yl)phenyl benzoate in DMSO solvent

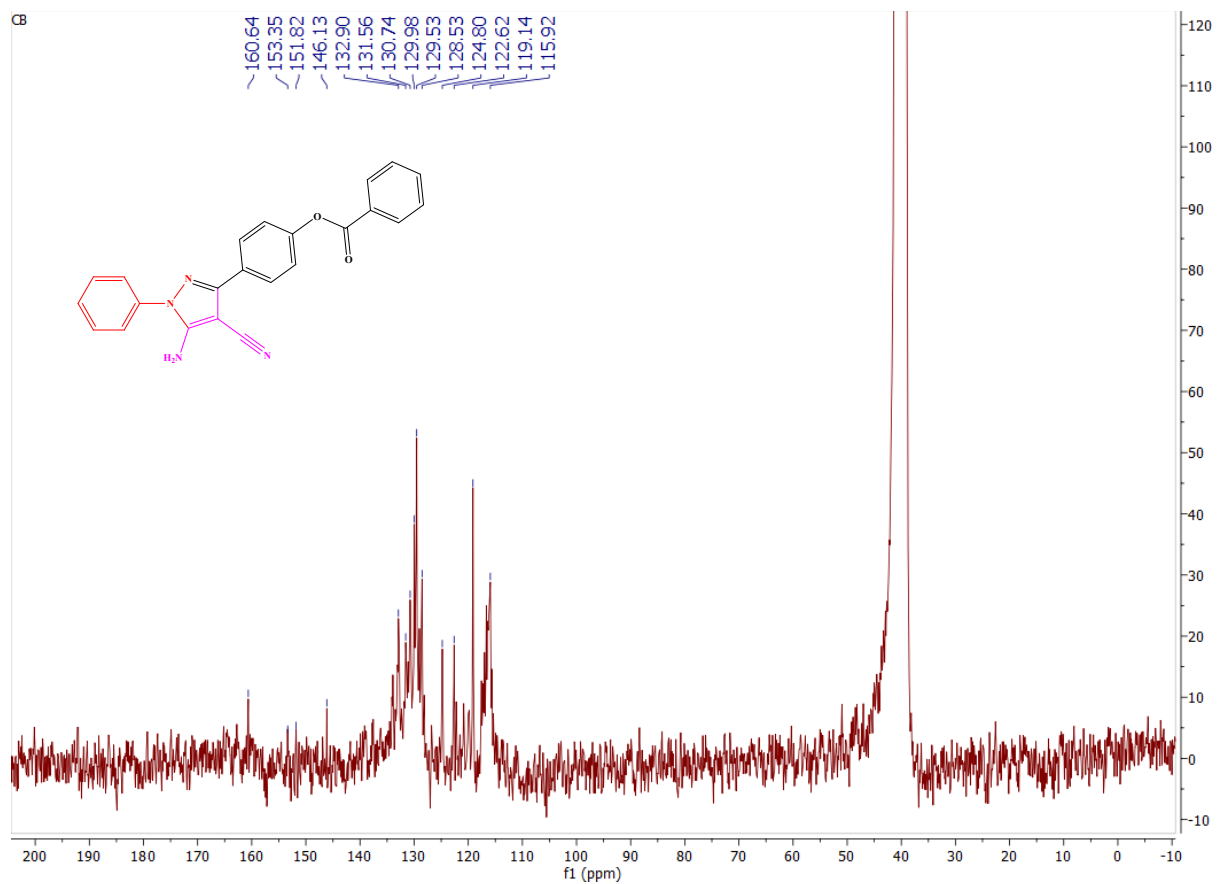

**Fig. S33.** The <sup>13</sup>C NMR spectrum of 4-(5-amino-4-cyano-1-phenyl-1H-pyrazol-3-yl)phenyl benzoate in DMSO solvent
